# Supplementary material
Source: PubMed Central journal article supplement (PMC3005818)

**Chiral Brønsted Base-Promoted Nitroalkane Alkylation: Enantioselective Synthesis of *sec*-Alkyl-3-Substituted Indoles**

Mark C. Dobish and Jeffrey N. Johnston\*

Department of Chemistry & Vanderbilt Institute of Chemical Biology  
Vanderbilt University  
2301 Vanderbilt Place, Nashville, TN 37235-1822

|                                                                       | S-II-X |
|-----------------------------------------------------------------------|--------|
| Figure 1. $^1\text{H}$ NMR ( $\text{CDCl}_3$ ) of 5d.....             | 3      |
| Figure 2. $^{13}\text{C}$ NMR ( $\text{CDCl}_3$ ) of 5d.....          | 4      |
| Figure 3. $^1\text{H}$ NMR ( $\text{CDCl}_3$ ) of 5e.....             | 5      |
| Figure 4. $^{13}\text{C}$ NMR ( $\text{CDCl}_3$ ) of 5e.....          | 6      |
| Figure 5. $^1\text{H}$ NMR ( $\text{CDCl}_3$ ) of 5f.....             | 7      |
| Figure 6. $^{13}\text{C}$ NMR ( $\text{CDCl}_3$ ) of 5f.....          | 8      |
| Figure 7. $^1\text{H}$ NMR ( $\text{CDCl}_3$ ) of 5g.....             | 9      |
| Figure 8. $^{13}\text{C}$ NMR ( $\text{CDCl}_3$ ) of 5g.....          | 10     |
| Figure 9. $^1\text{H}$ NMR ( $\text{CDCl}_3$ ) of 5h.....             | 11     |
| Figure 10. $^{13}\text{C}$ NMR ( $\text{CDCl}_3$ ) of 5h.....         | 12     |
| Figure 11. $^1\text{H}$ NMR ( $\text{CDCl}_3$ ) of 5i.....            | 13     |
| Figure 12. $^{13}\text{C}$ NMR ( $\text{CDCl}_3$ ) of 5i.....         | 14     |
| Figure 13. $^1\text{H}$ NMR ( $\text{CDCl}_3$ ) of 5k.....            | 15     |
| Figure 14. $^{13}\text{C}$ NMR ( $\text{CDCl}_3$ ) of 5k.....         | 16     |
| Figure 15. $^1\text{H}$ NMR ( $\text{CDCl}_3$ ) of 5l.....            | 17     |
| Figure 16. $^{13}\text{C}$ NMR ( $\text{CDCl}_3$ ) of 5l.....         | 18     |
| Figure 17. $^1\text{H}$ NMR ( $\text{CDCl}_3$ ) of 6a (major).....    | 19     |
| Figure 18. $^{13}\text{C}$ NMR ( $\text{CDCl}_3$ ) of 6a (major)..... | 20     |
| Figure 19. $^1\text{H}$ NMR ( $\text{CDCl}_3$ ) of 6a (minor).....    | 21     |
| Figure 20. $^{13}\text{C}$ NMR ( $\text{CDCl}_3$ ) of 6a (minor)..... | 22     |
| Figure 21. $^1\text{H}$ NMR ( $\text{CDCl}_3$ ) of 6b.....            | 23     |
| Figure 22. $^{13}\text{C}$ NMR ( $\text{CDCl}_3$ ) of 6b.....         | 24     |
| Figure 23. $^1\text{H}$ NMR ( $\text{CDCl}_3$ ) of 6c.....            | 25     |
| Figure 24. $^{13}\text{C}$ NMR ( $\text{CDCl}_3$ ) of 6c.....         | 26     |
| Figure 25. $^1\text{H}$ NMR ( $\text{CDCl}_3$ ) of 6d.....            | 27     |
| Figure 26. $^{13}\text{C}$ NMR ( $\text{CDCl}_3$ ) of 6d.....         | 28     |
| Figure 27. $^1\text{H}$ NMR ( $\text{CDCl}_3$ ) of 6e.....            | 29     |
| Figure 28. $^{13}\text{C}$ NMR ( $\text{CDCl}_3$ ) of 6e.....         | 30     |
| Figure 29. $^1\text{H}$ NMR ( $\text{CDCl}_3$ ) of 6f.....            | 31     |
| Figure 30. $^{13}\text{C}$ NMR ( $\text{CDCl}_3$ ) of 6f.....         | 32     |
| Figure 31. $^1\text{H}$ NMR ( $\text{CDCl}_3$ ) of 6g.....            | 33     |
| Figure 32. $^{13}\text{C}$ NMR ( $\text{CDCl}_3$ ) of 6g.....         | 34     |
| Figure 33. $^1\text{H}$ NMR ( $\text{CDCl}_3$ ) of 6h.....            | 35     |
| Figure 34. $^{13}\text{C}$ NMR ( $\text{CDCl}_3$ ) of 6h.....         | 36     |
| Figure 35. $^1\text{H}$ NMR ( $\text{CDCl}_3$ ) of 6i.....            | 37     |
| Figure 36. $^{13}\text{C}$ NMR ( $\text{CDCl}_3$ ) of 6i.....         | 38     |
| Figure 37. $^1\text{H}$ NMR ( $\text{CDCl}_3$ ) of 6j.....            | 39     |

|                                                               |    |
|---------------------------------------------------------------|----|
| Figure 38. $^{13}\text{C}$ NMR ( $\text{CDCl}_3$ ) of 6j..... | 40 |
| Figure 39. $^1\text{H}$ NMR ( $\text{CDCl}_3$ ) of 6k.....    | 41 |
| Figure 40. $^{13}\text{C}$ NMR ( $\text{CDCl}_3$ ) of 6k..... | 42 |
| Figure 41. $^1\text{H}$ NMR ( $\text{CDCl}_3$ ) of 6l.....    | 43 |
| Figure 42. $^{13}\text{C}$ NMR ( $\text{CDCl}_3$ ) of 6l..... | 44 |
| Figure 43. $^1\text{H}$ NMR ( $\text{CDCl}_3$ ) of 6m.....    | 45 |
| Figure 44. $^{13}\text{C}$ NMR ( $\text{CDCl}_3$ ) of 6m..... | 46 |
| Figure 45. $^1\text{H}$ NMR ( $\text{CDCl}_3$ ) of 6n.....    | 47 |
| Figure 46. $^{13}\text{C}$ NMR ( $\text{CDCl}_3$ ) of 6n..... | 48 |
| Figure 47. $^1\text{H}$ NMR ( $\text{CDCl}_3$ ) of 6o.....    | 49 |
| Figure 48. $^{13}\text{C}$ NMR ( $\text{CDCl}_3$ ) of 6o..... | 50 |
| Figure 49. $^1\text{H}$ NMR ( $\text{CDCl}_3$ ) of 9.....     | 51 |
| Figure 50. $^{13}\text{C}$ NMR ( $\text{CDCl}_3$ ) of 9.....  | 52 |

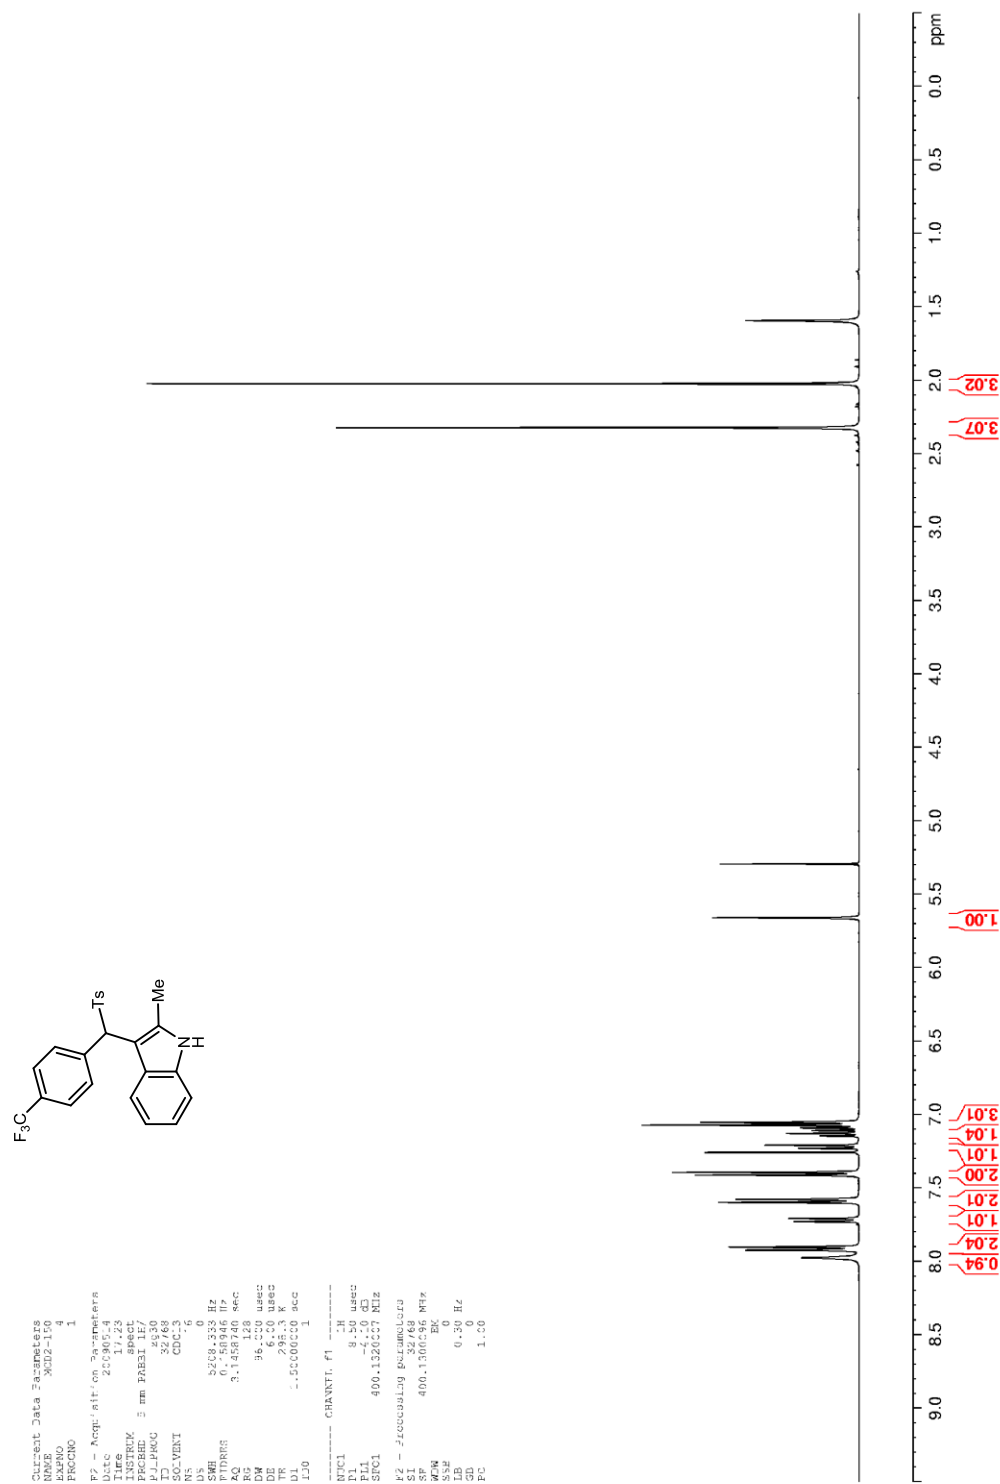

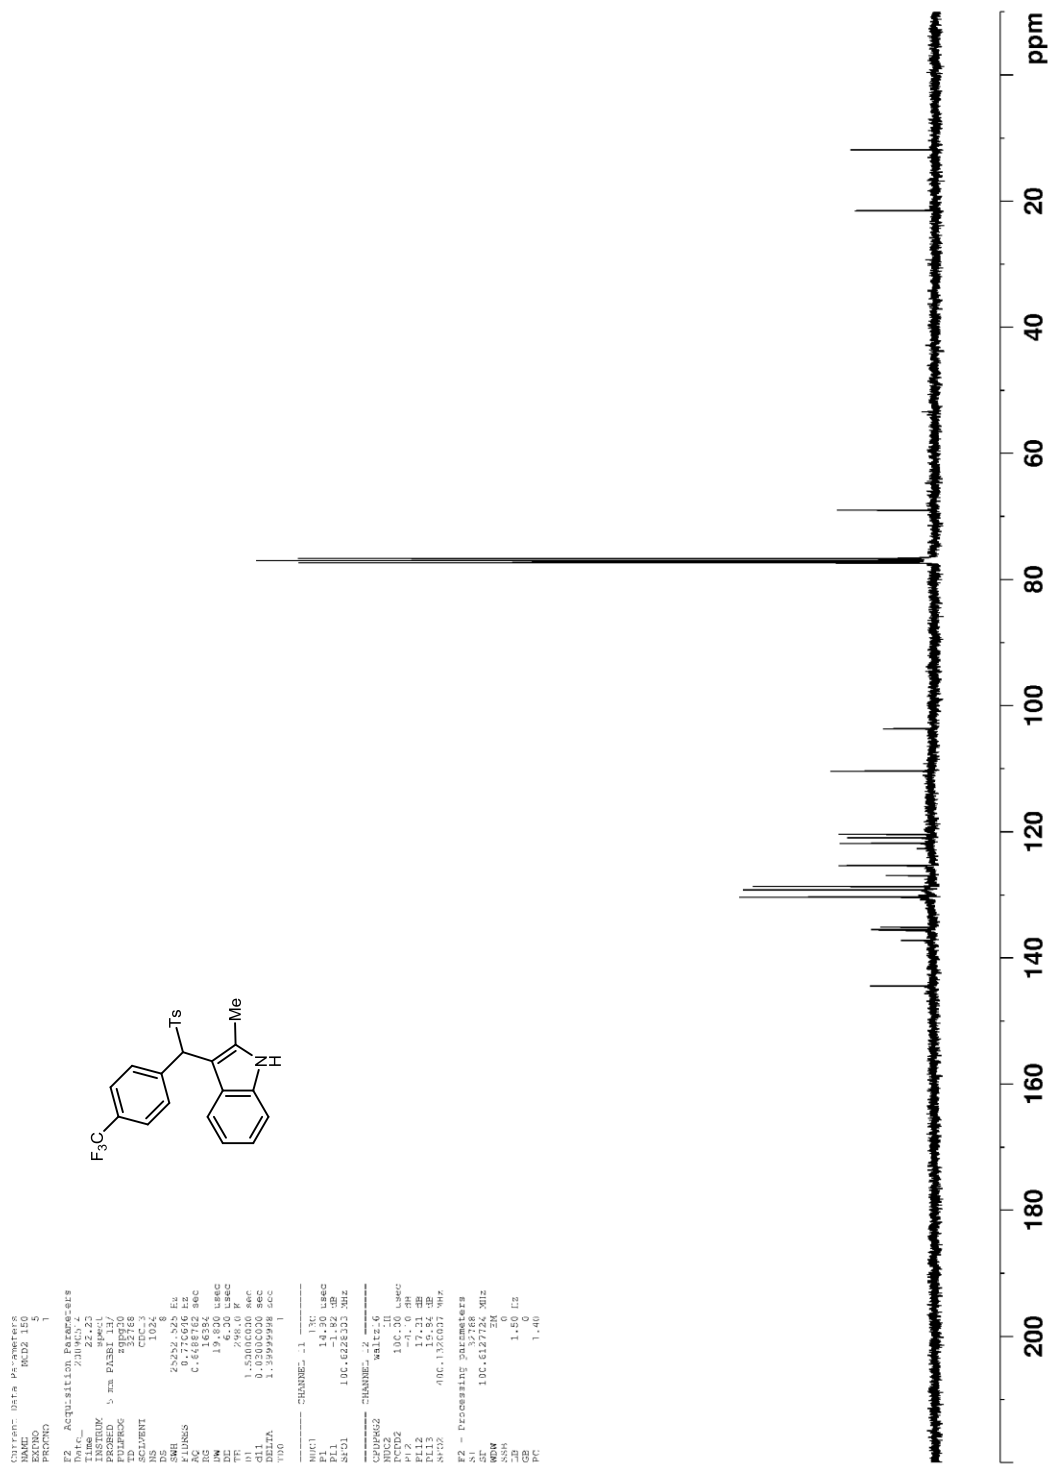

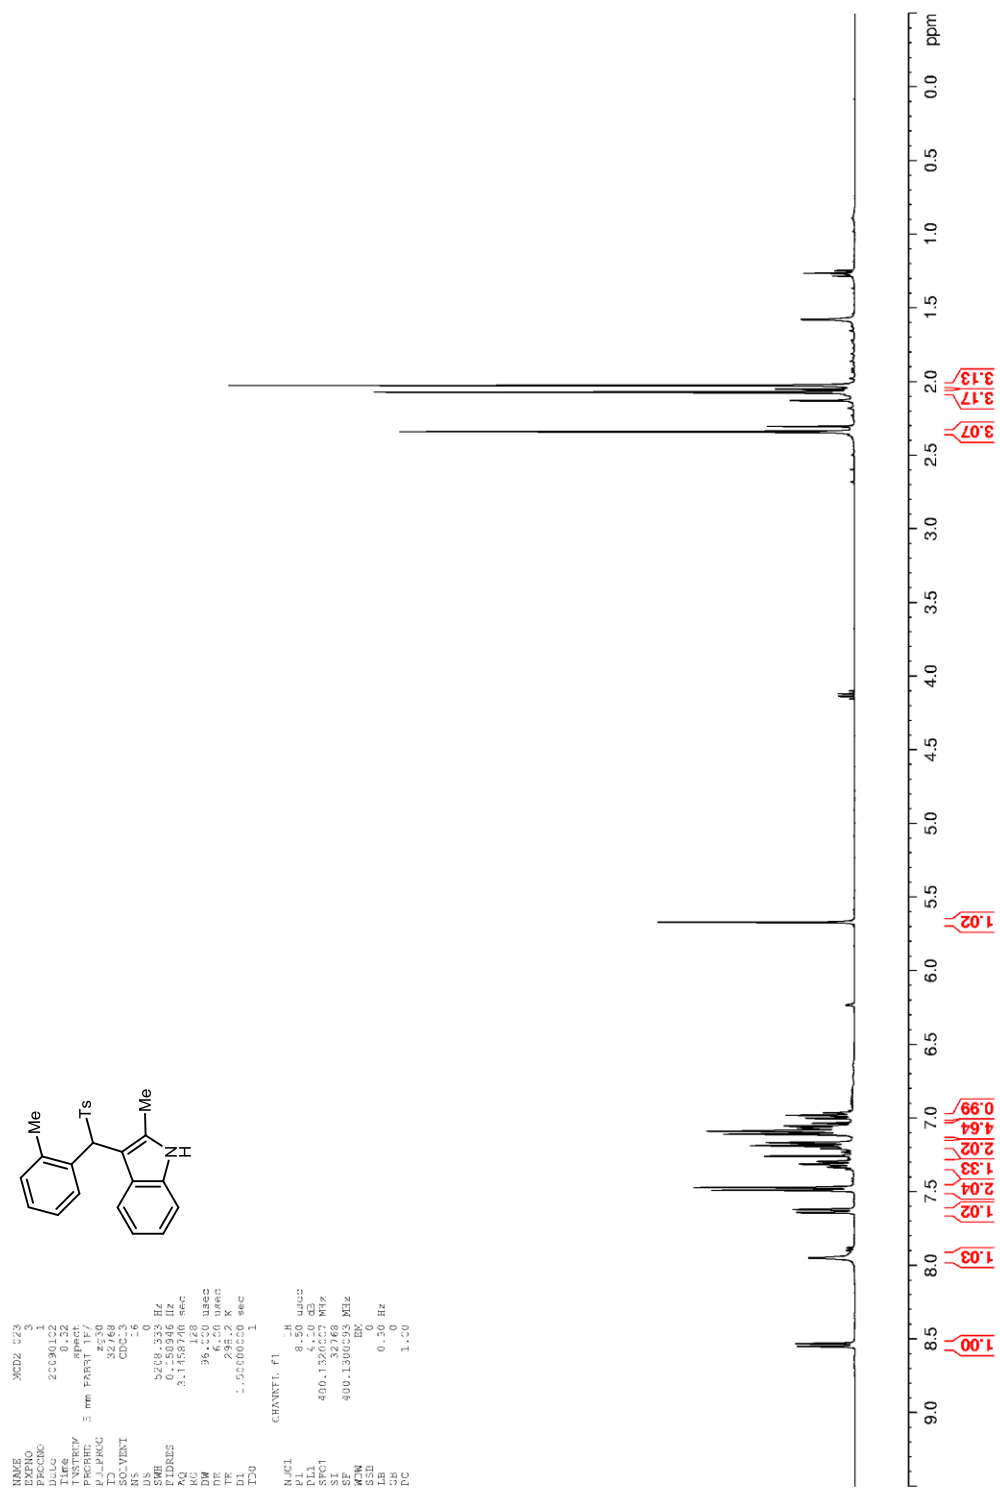

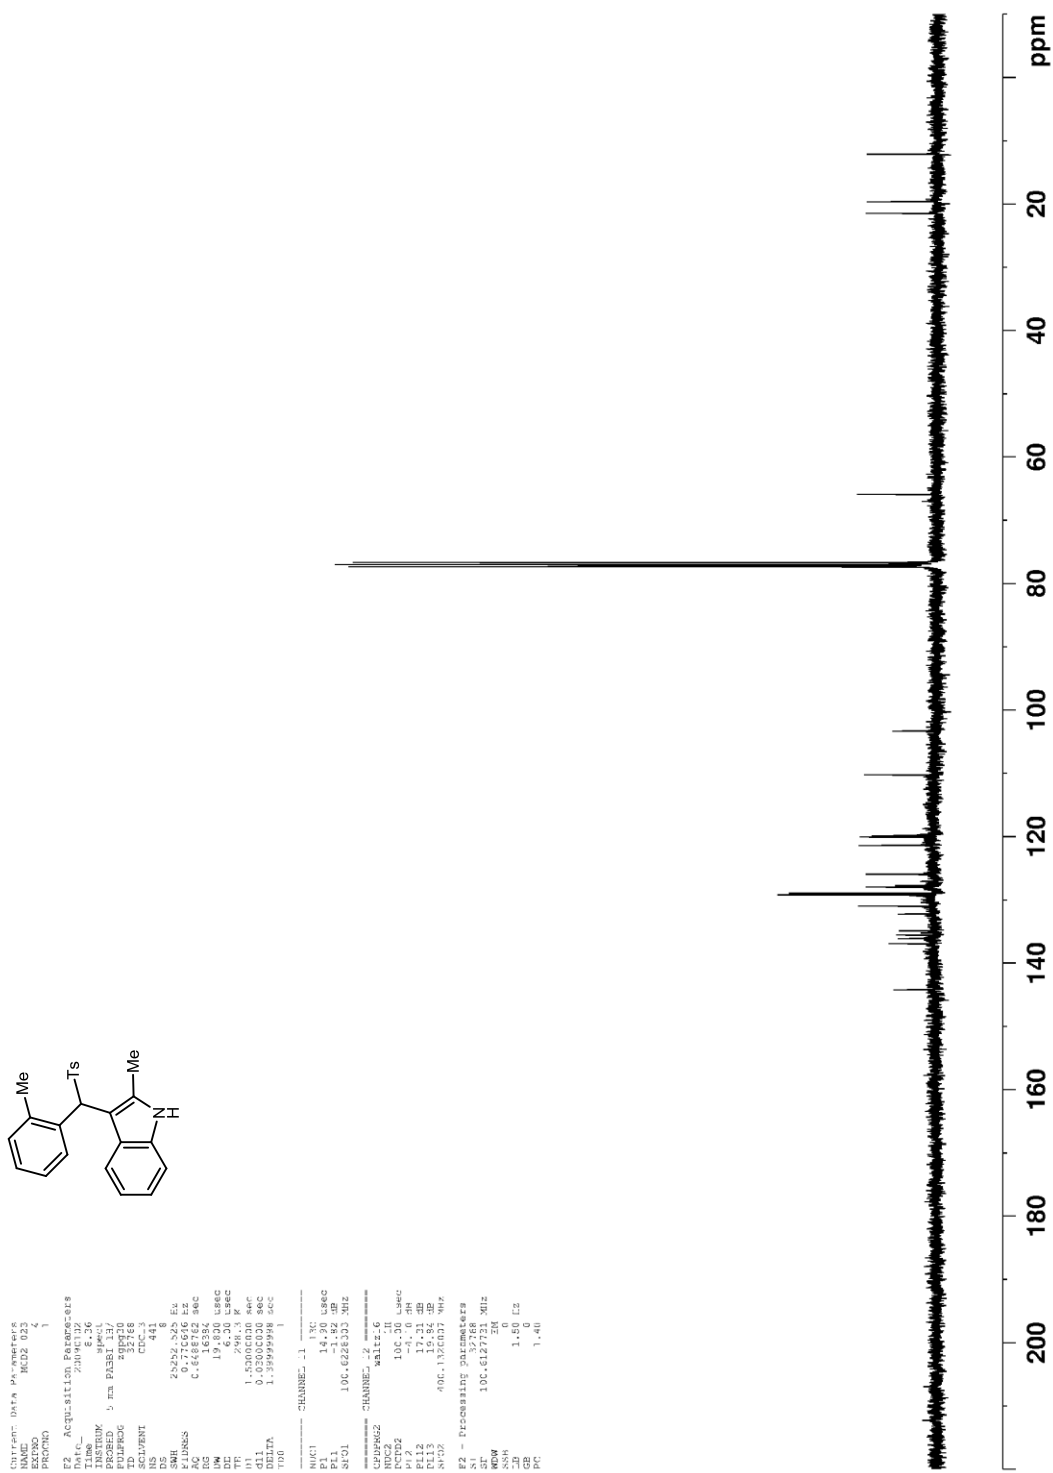

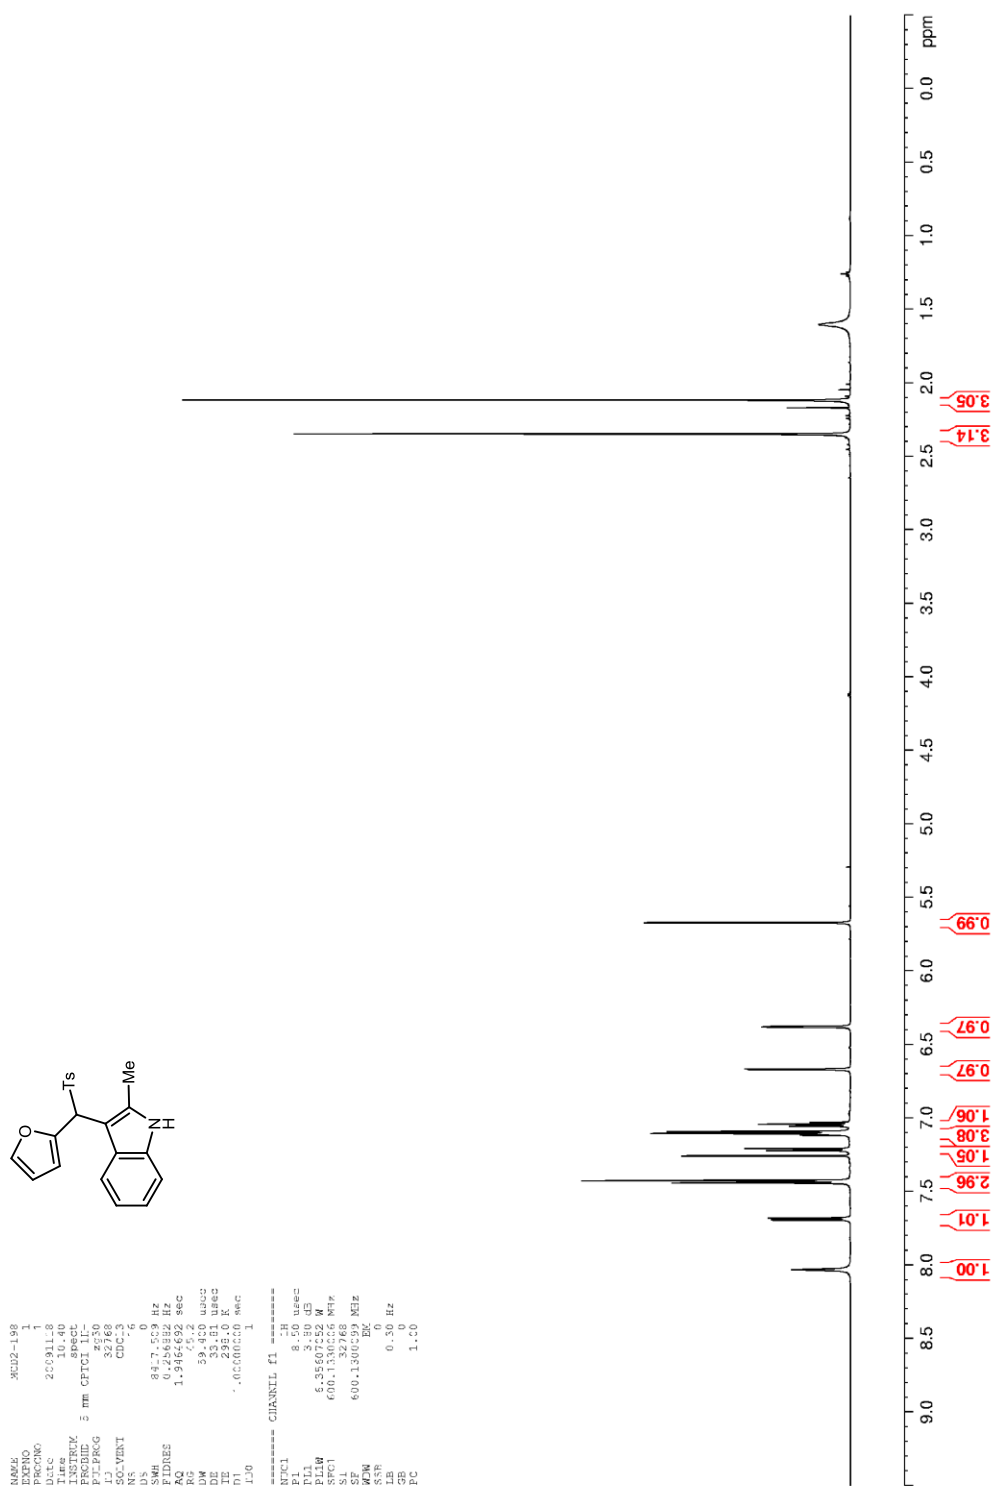

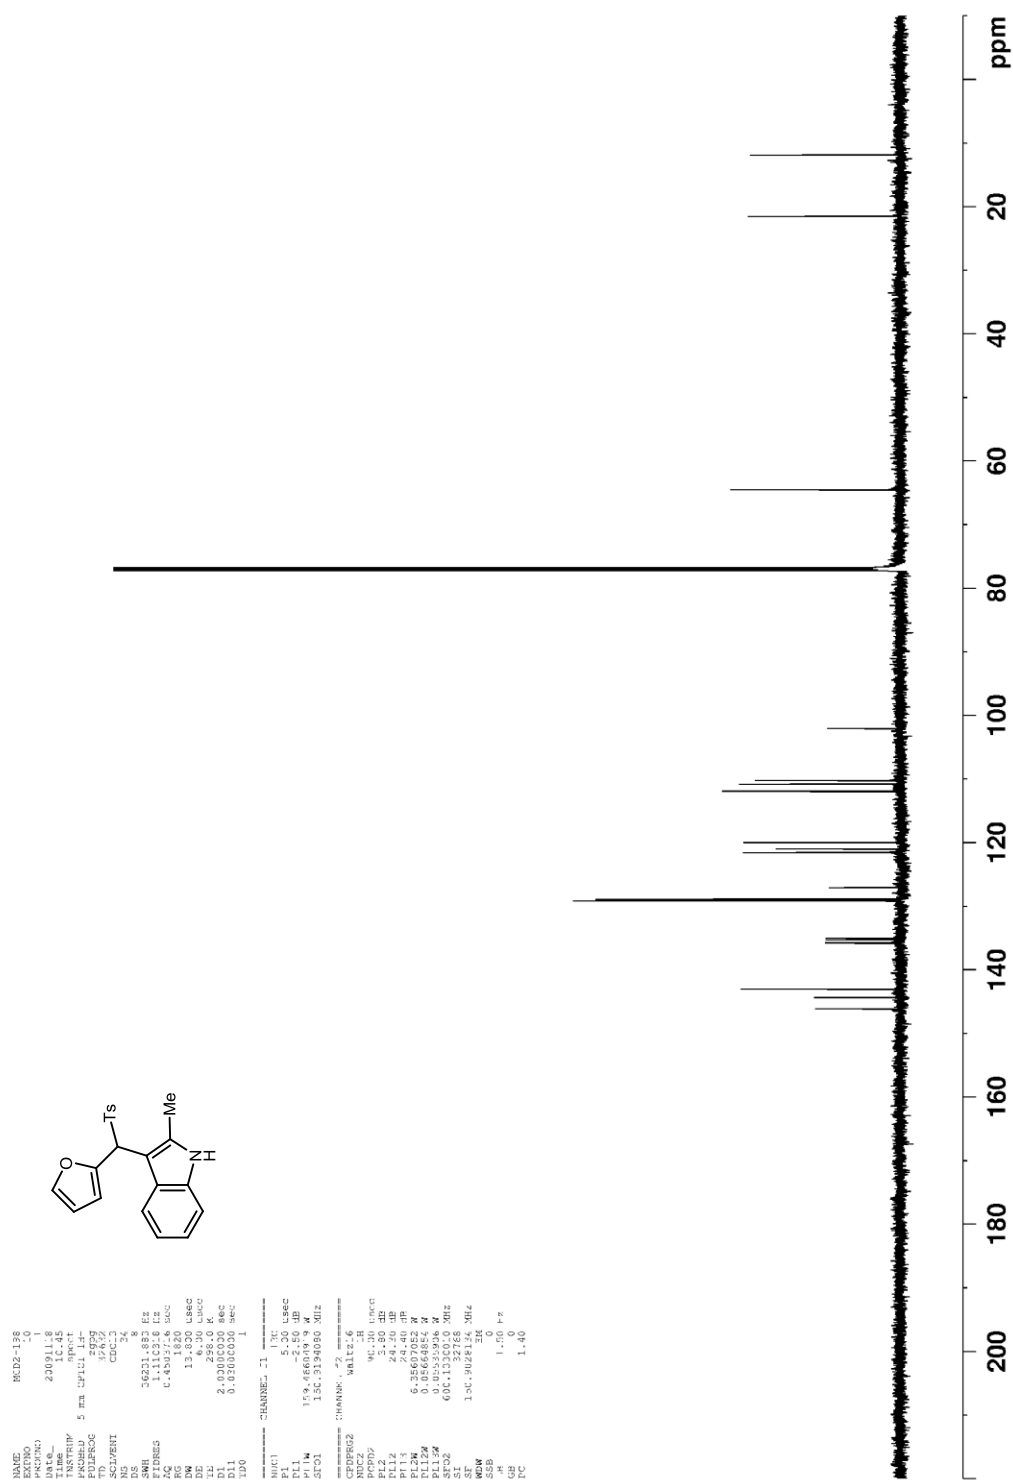



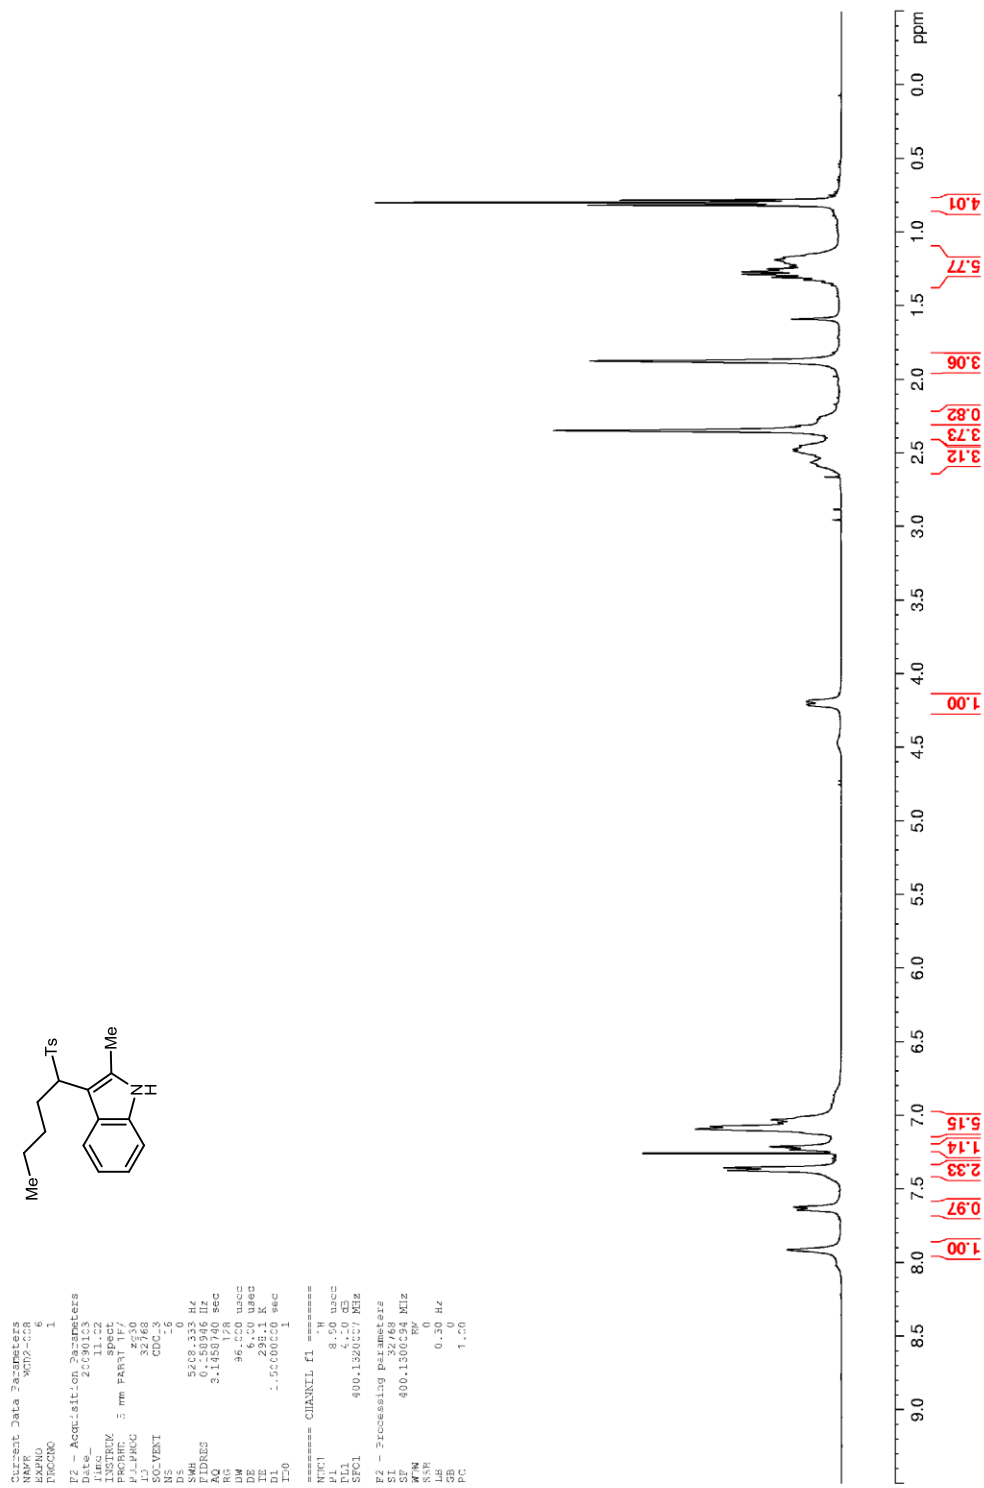

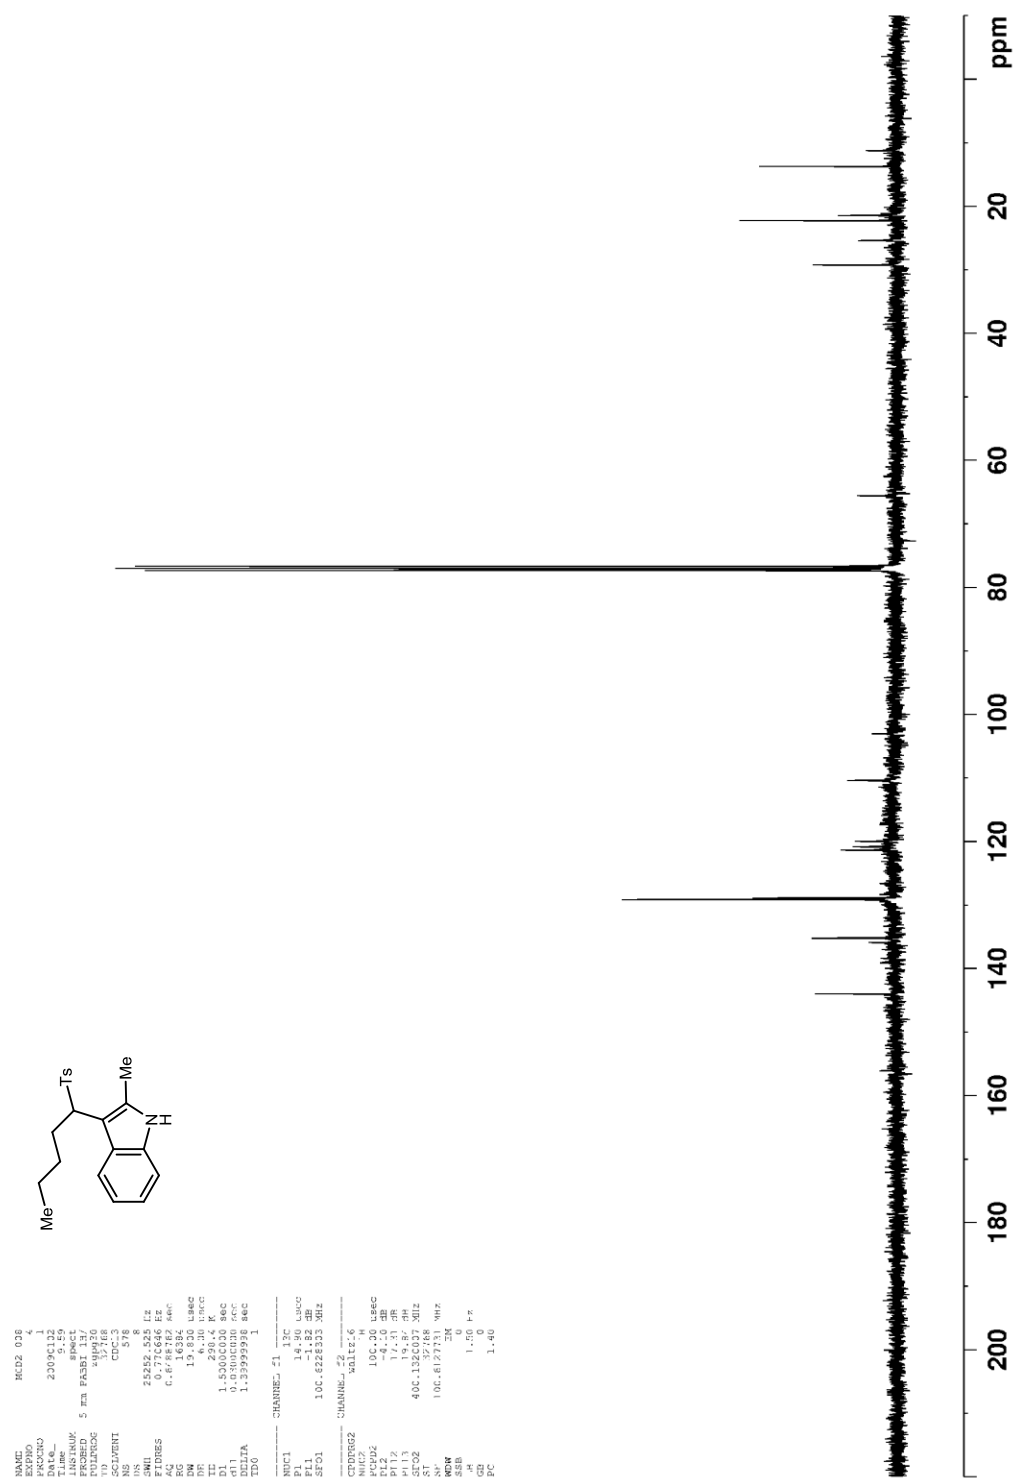

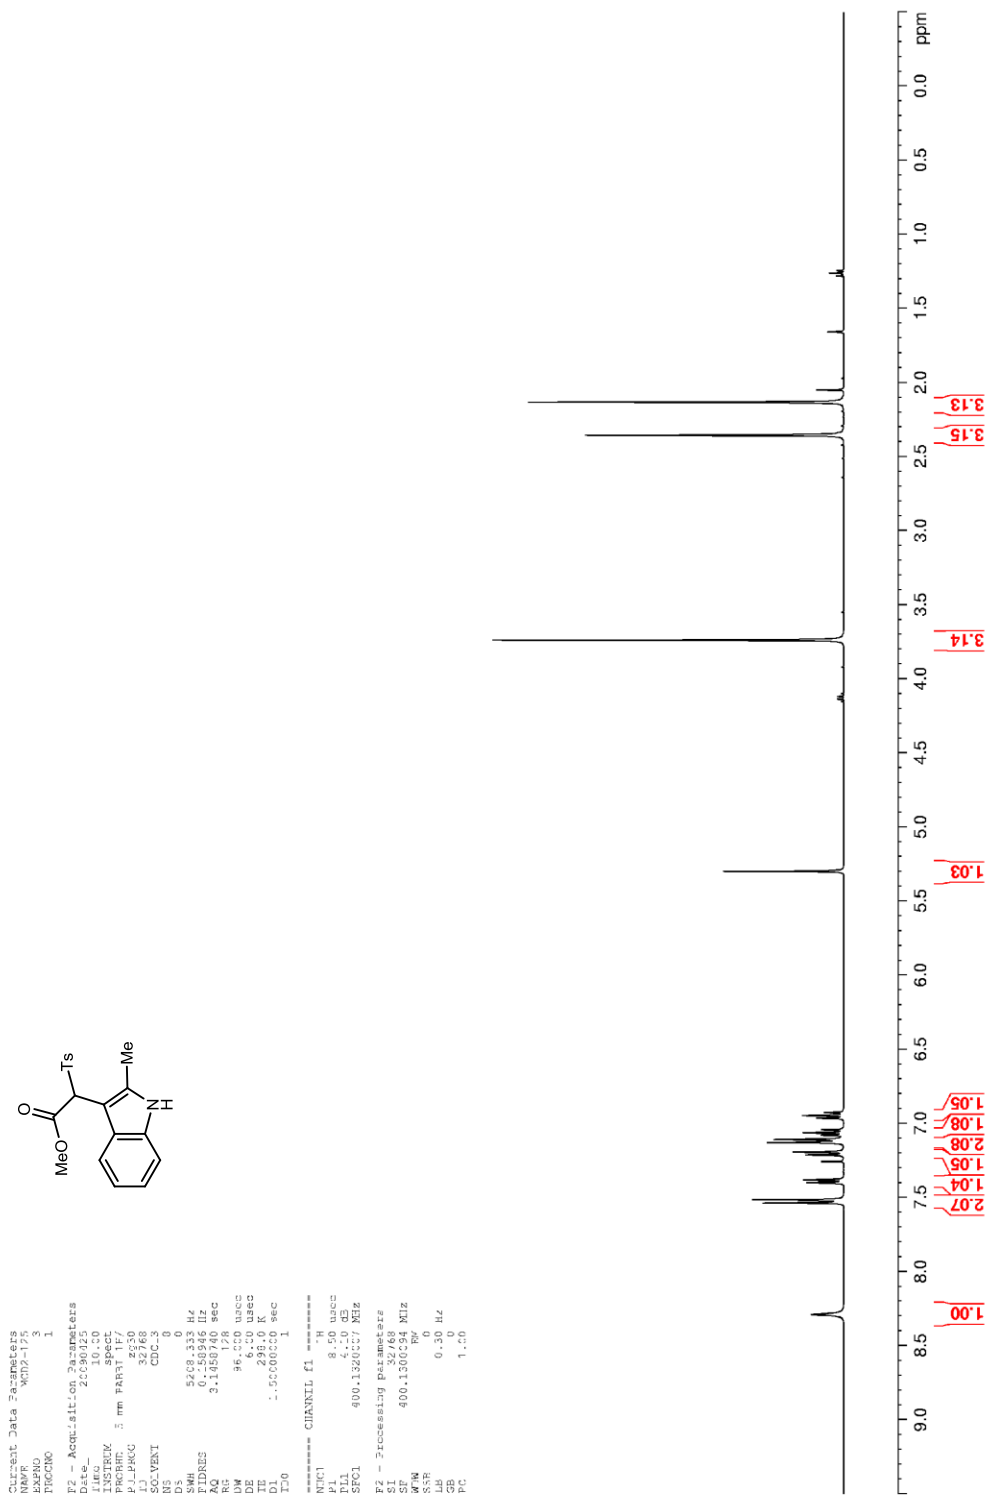

Figure 10. <sup>13</sup>C NMR (CDCl<sub>3</sub>) of 5h.

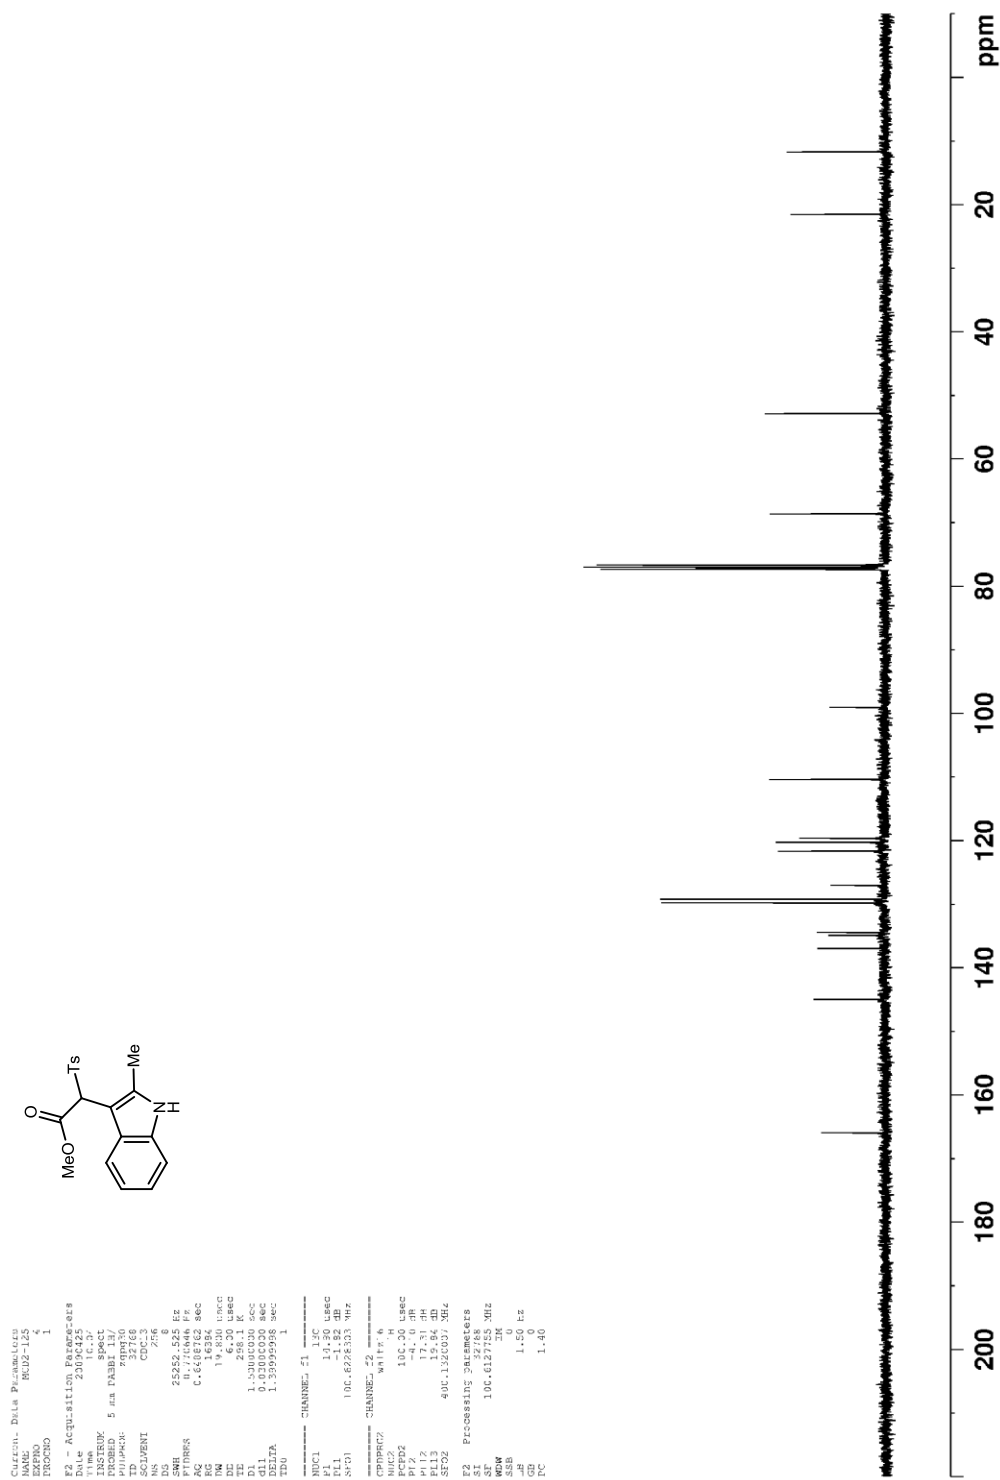

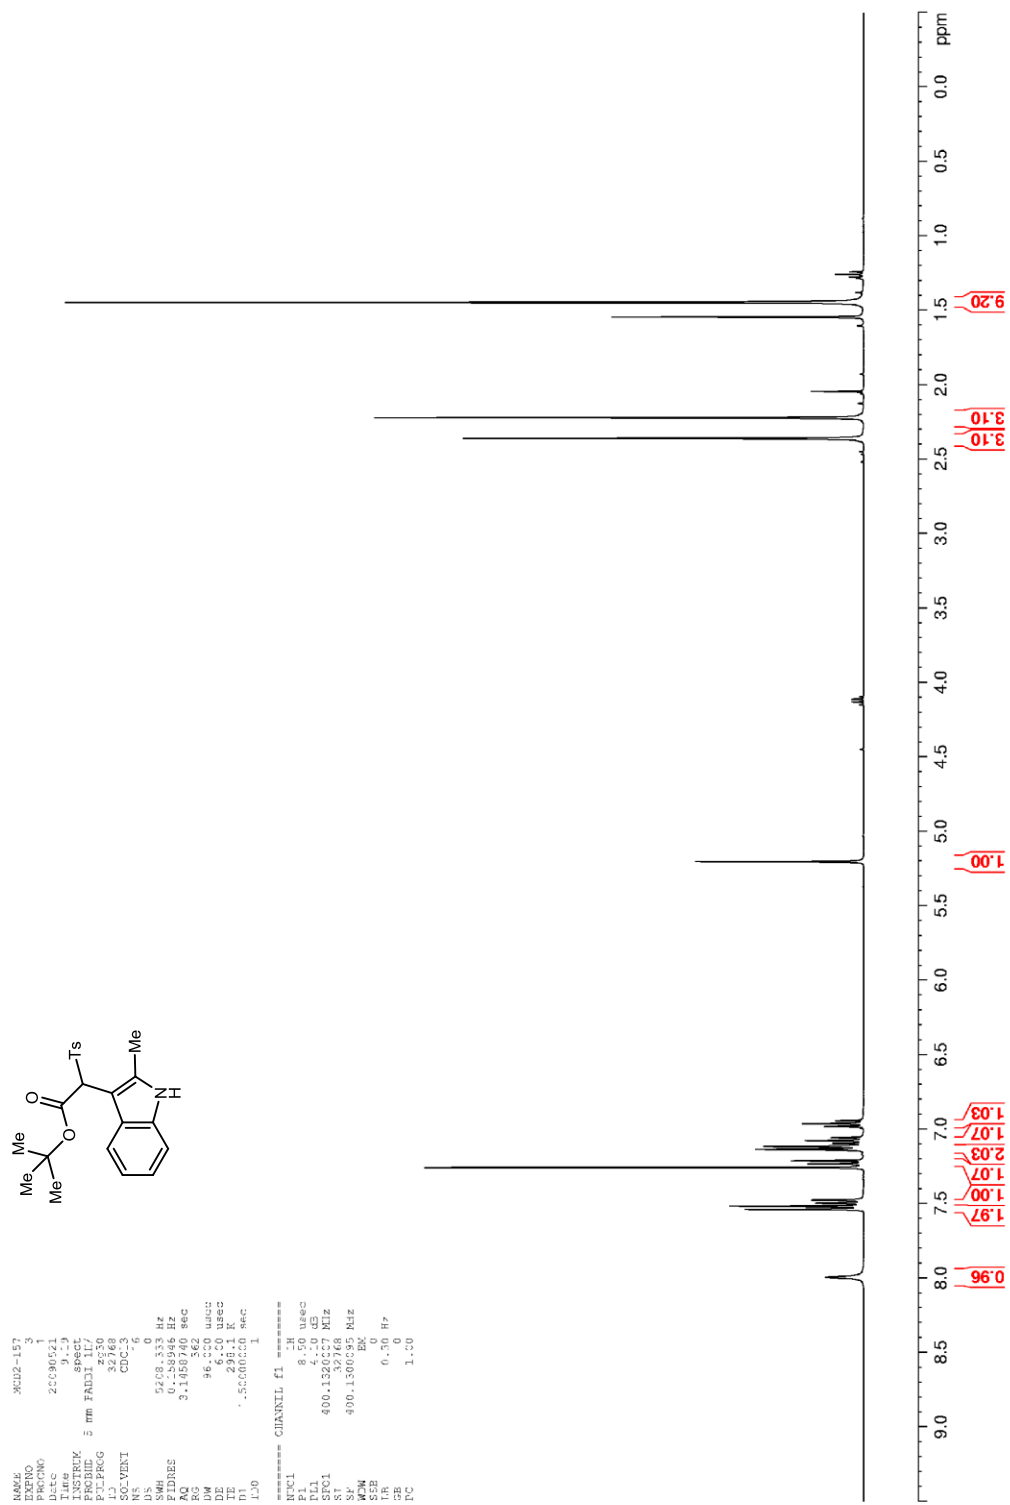



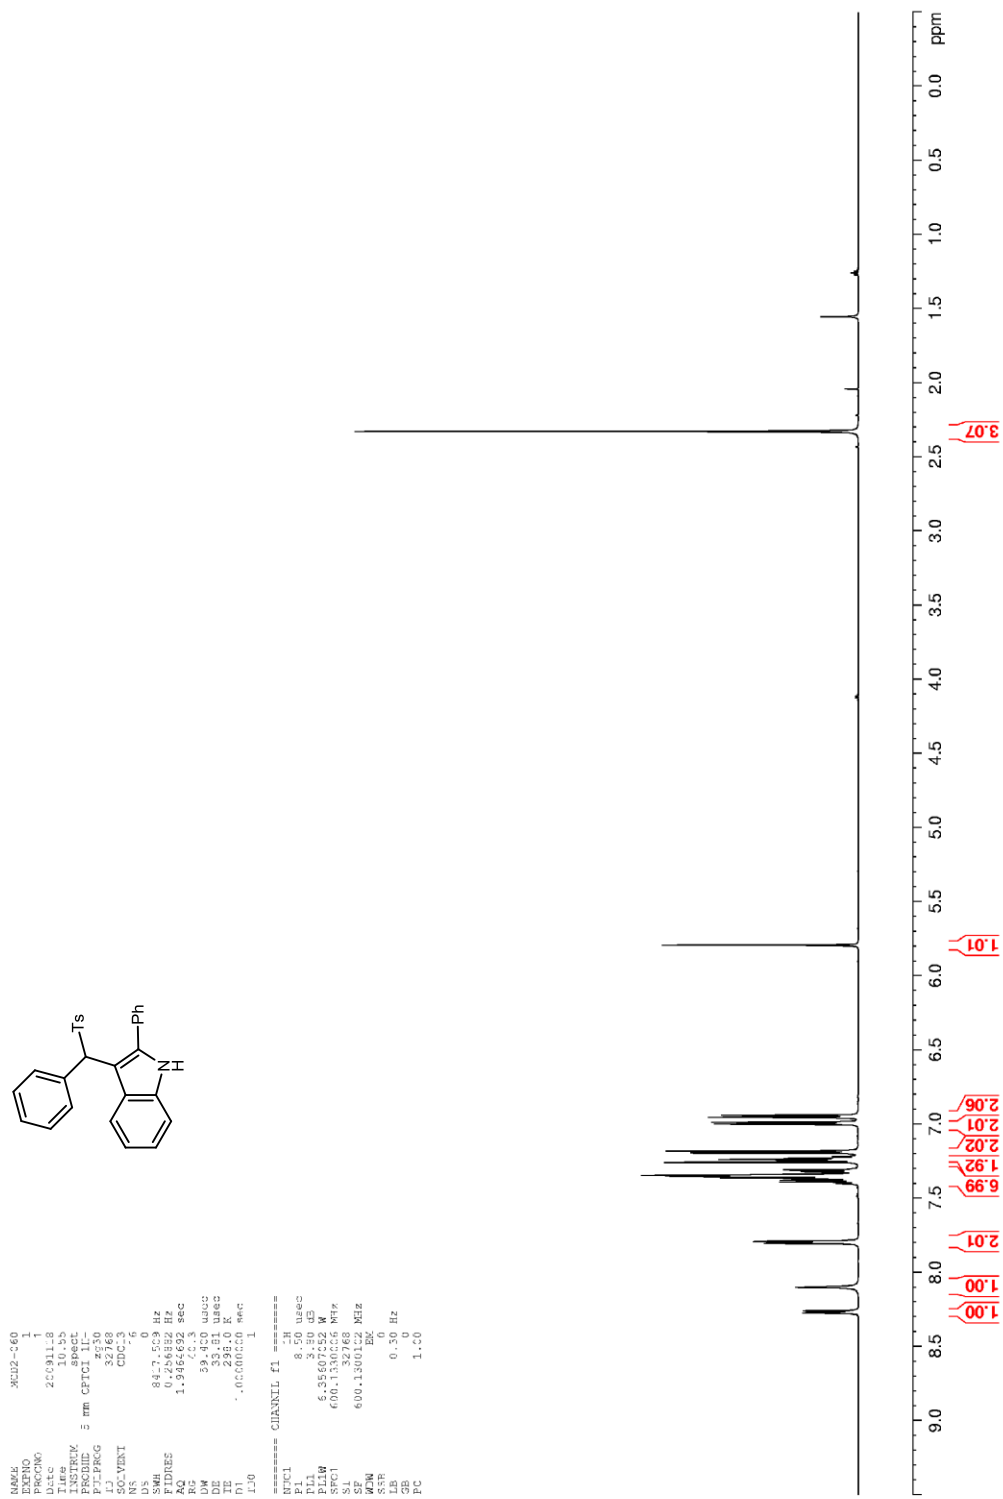

Figure 14.  $^{13}\text{C}$  NMR ( $\text{CDCl}_3$ ) of 5k.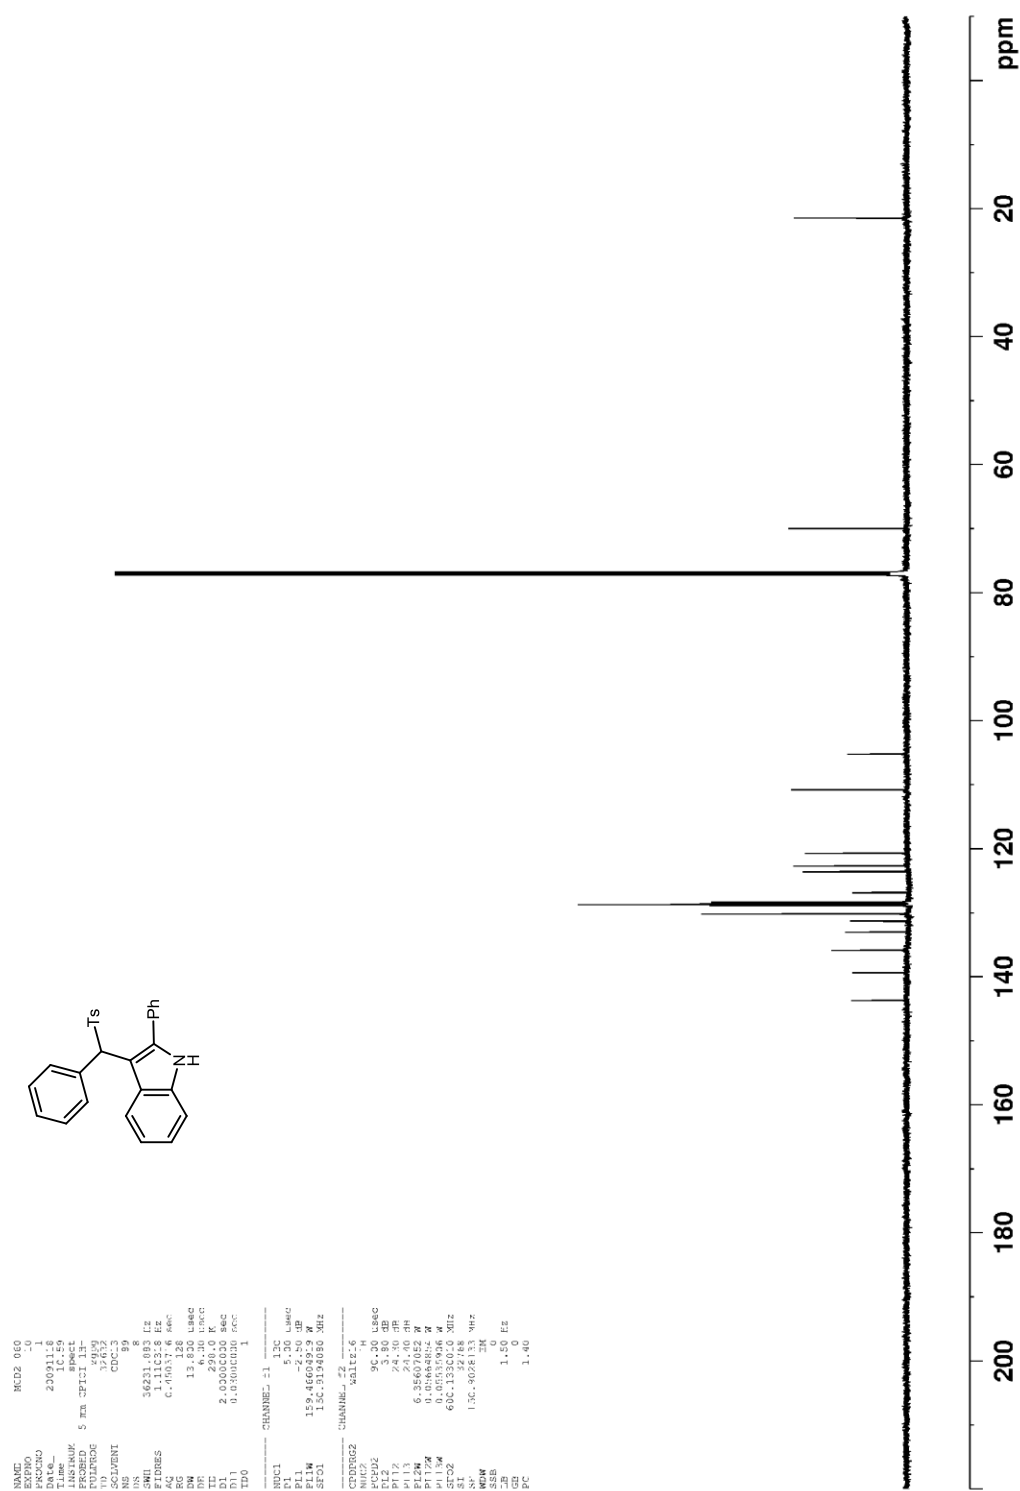



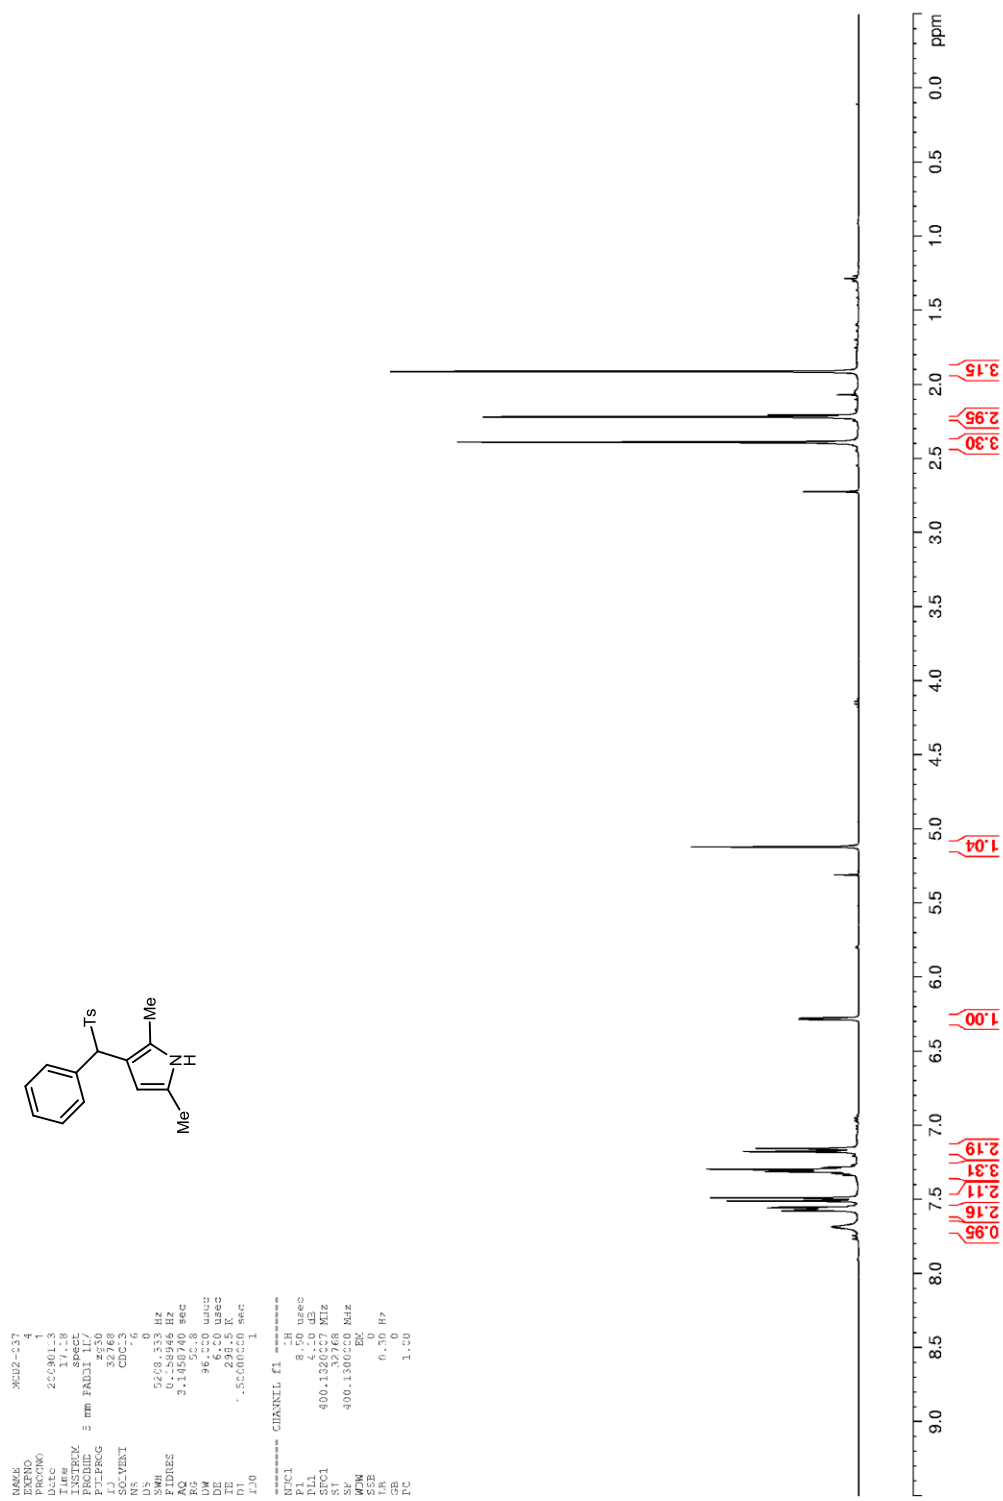

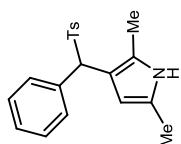

```

NAME          BKDZ 037
EXPNO         1
PROCNO       1
DATE_        20070120
TIME         15.30
INSTRUM      spect
PROBHD       5 mm PASSEL130
PULPROG      zgpg30
TD           32768
SOLVENT      CDCl3
NS           2048
DS           8
SWH           25052.525 Hz
AQ           0.40000000 sec
RG           327.68
ORF           1.00000000
DPR           6.20000000
TD           1.50000000
DE           0.10000000
DELTA        1.32999998 sec
TD           1

----- CHANNEL f1 -----
NUC1          13C
P1            14.50 uS
PL1           0.00 dB
SFO1          100.628355 MHz

----- CHANNEL f2 -----
NAME2         MSLT2-H
NUC2          1H
PCPD2         100.00 uS
PL2           0.00 dB
SFO2          400.146098 MHz
SI           65536
SF           400.146098 MHz
SSB           0
GB           0
H            1.20 Hz
PC           1.40
  
```

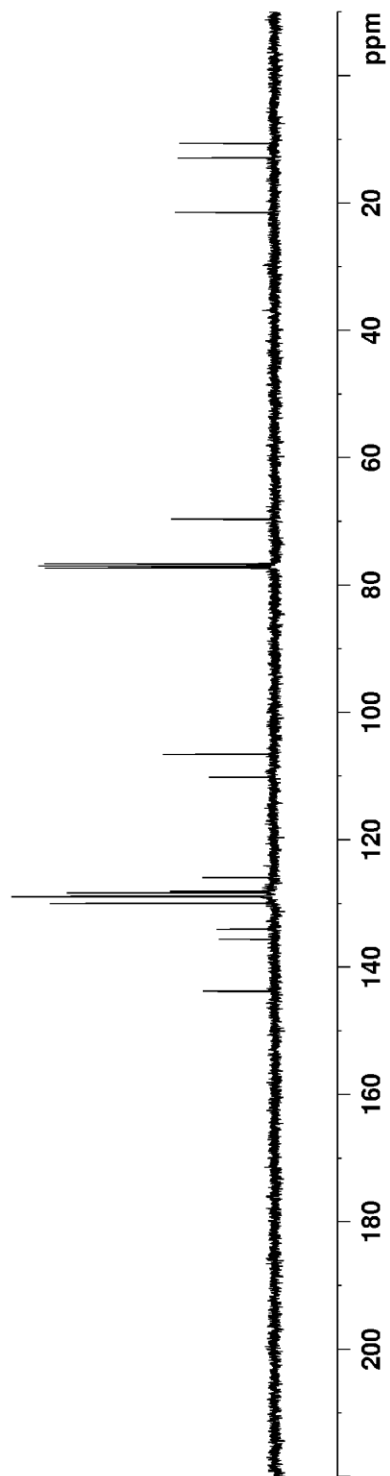

Figure 17.  $^1\text{H}$  NMR ( $\text{CDCl}_3$ ) of 6a (major).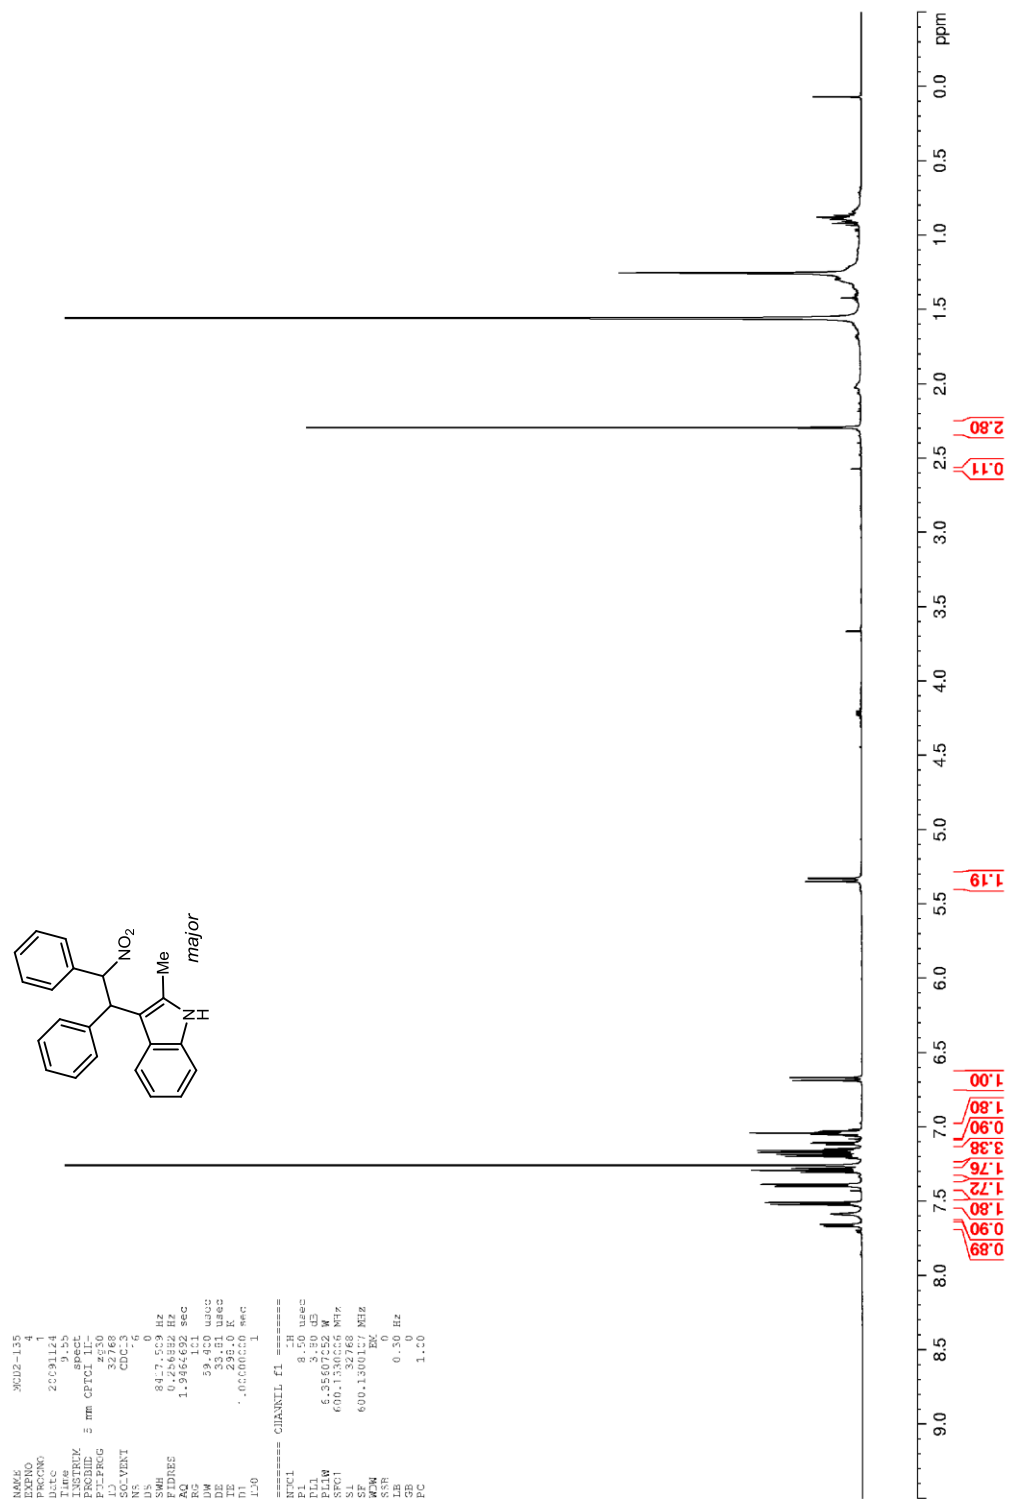

Figure 18.  $^{13}\text{C}$  NMR ( $\text{CDCl}_3$ ) of 6a (major).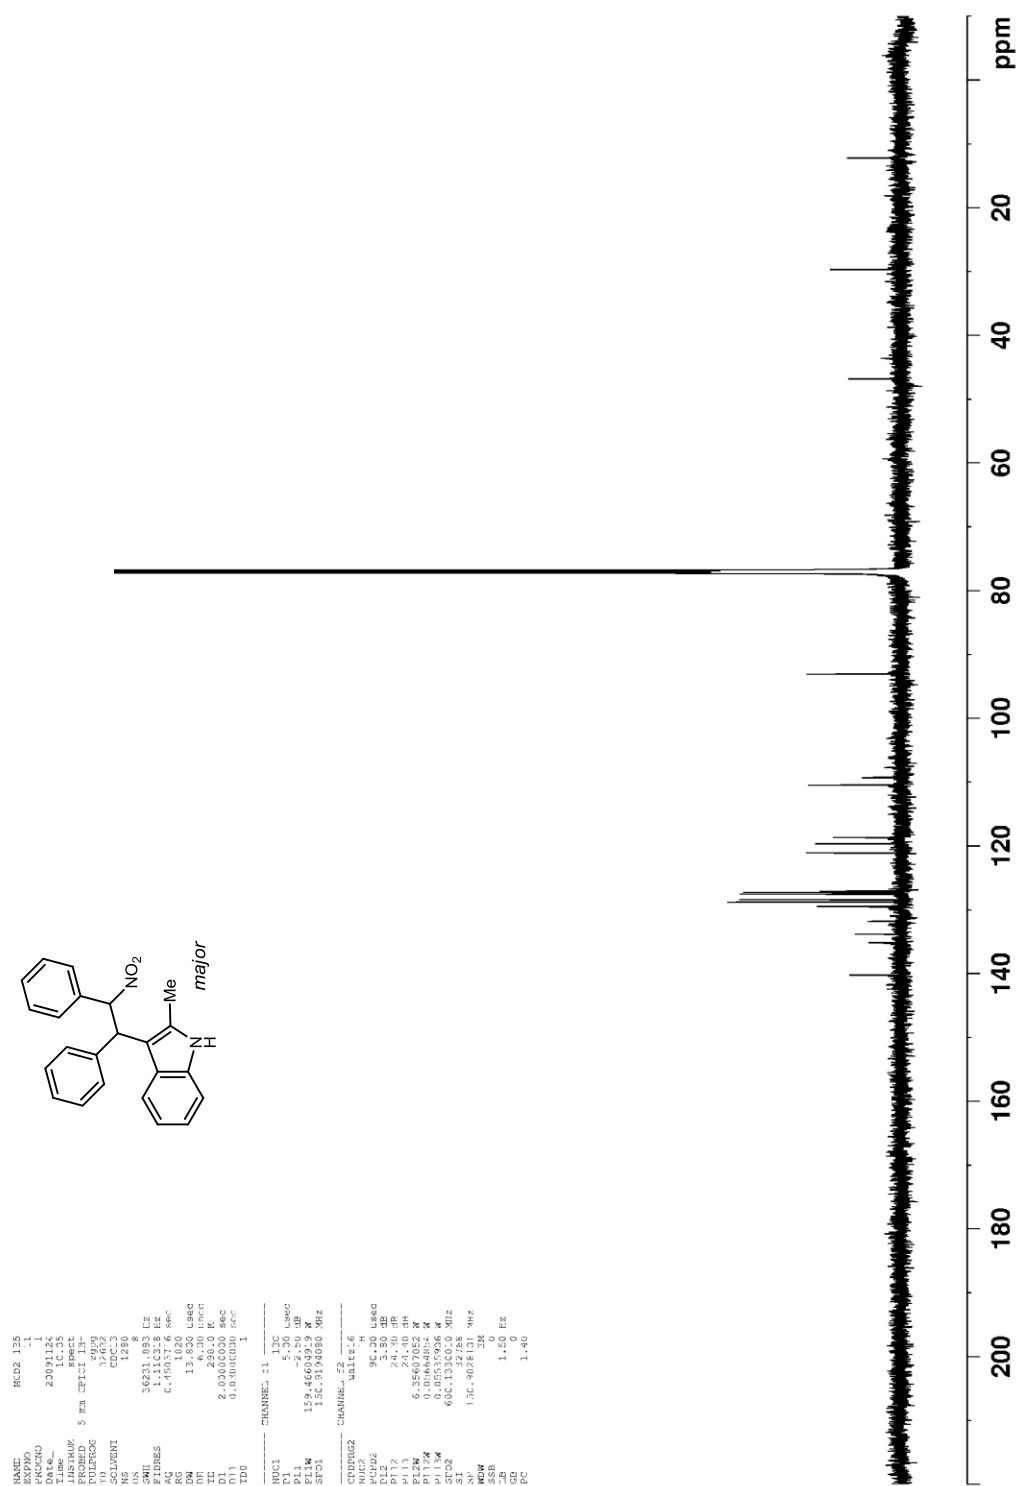

Figure 19.  $^1\text{H}$  NMR ( $\text{CDCl}_3$ ) of 6a (minor).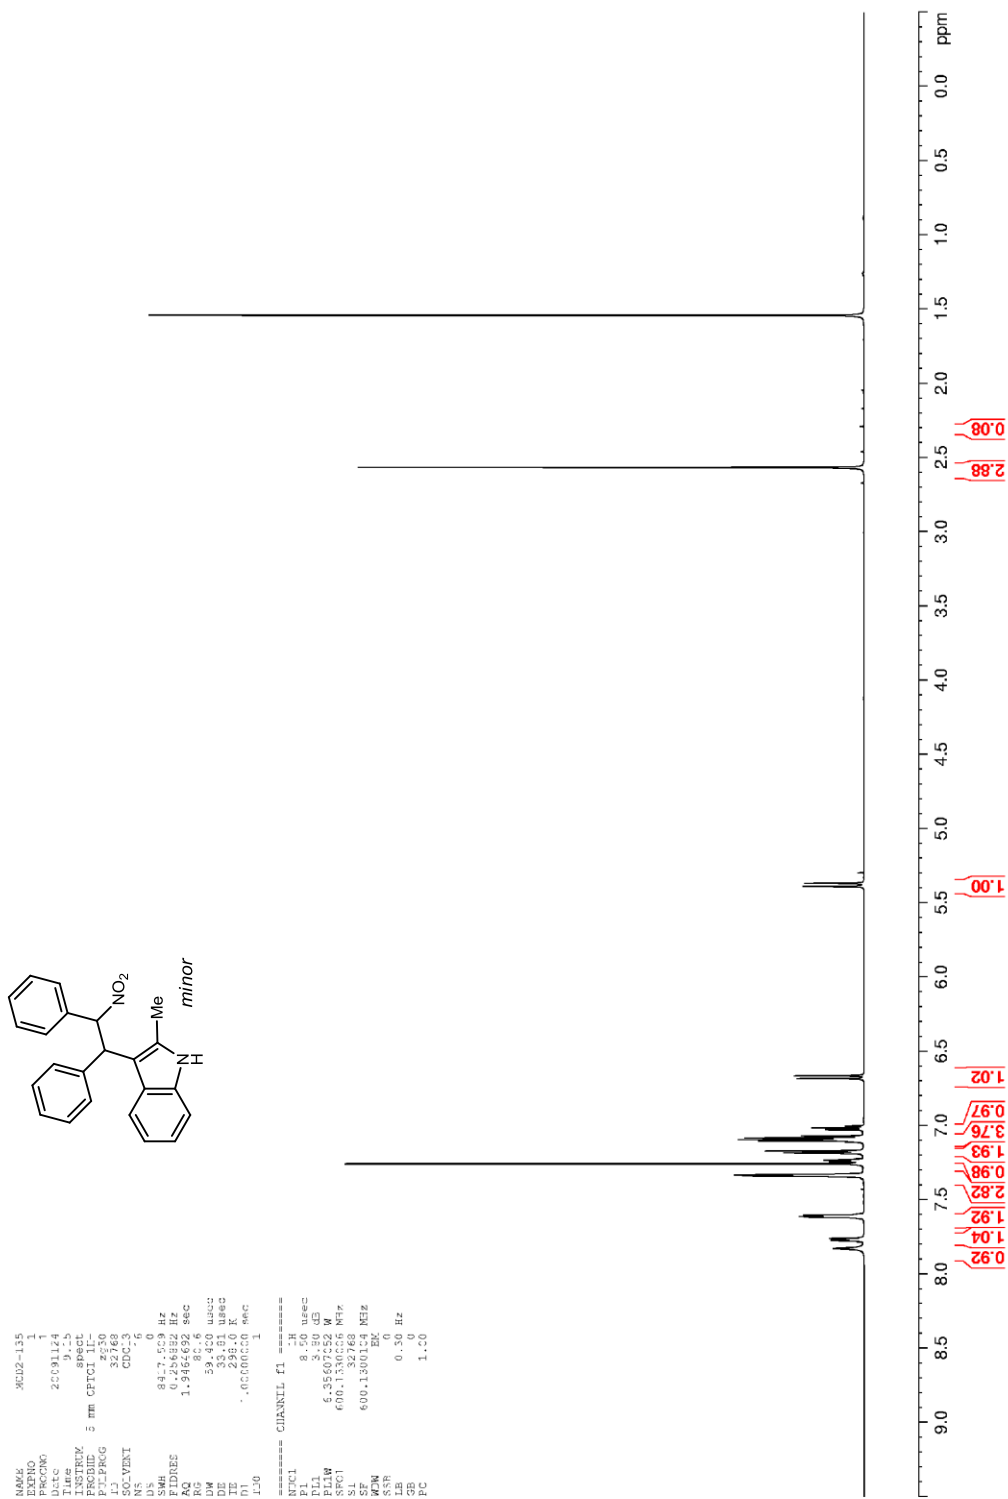

Figure 20.  $^{13}\text{C}$  NMR ( $\text{CDCl}_3$ ) of 6a (minor).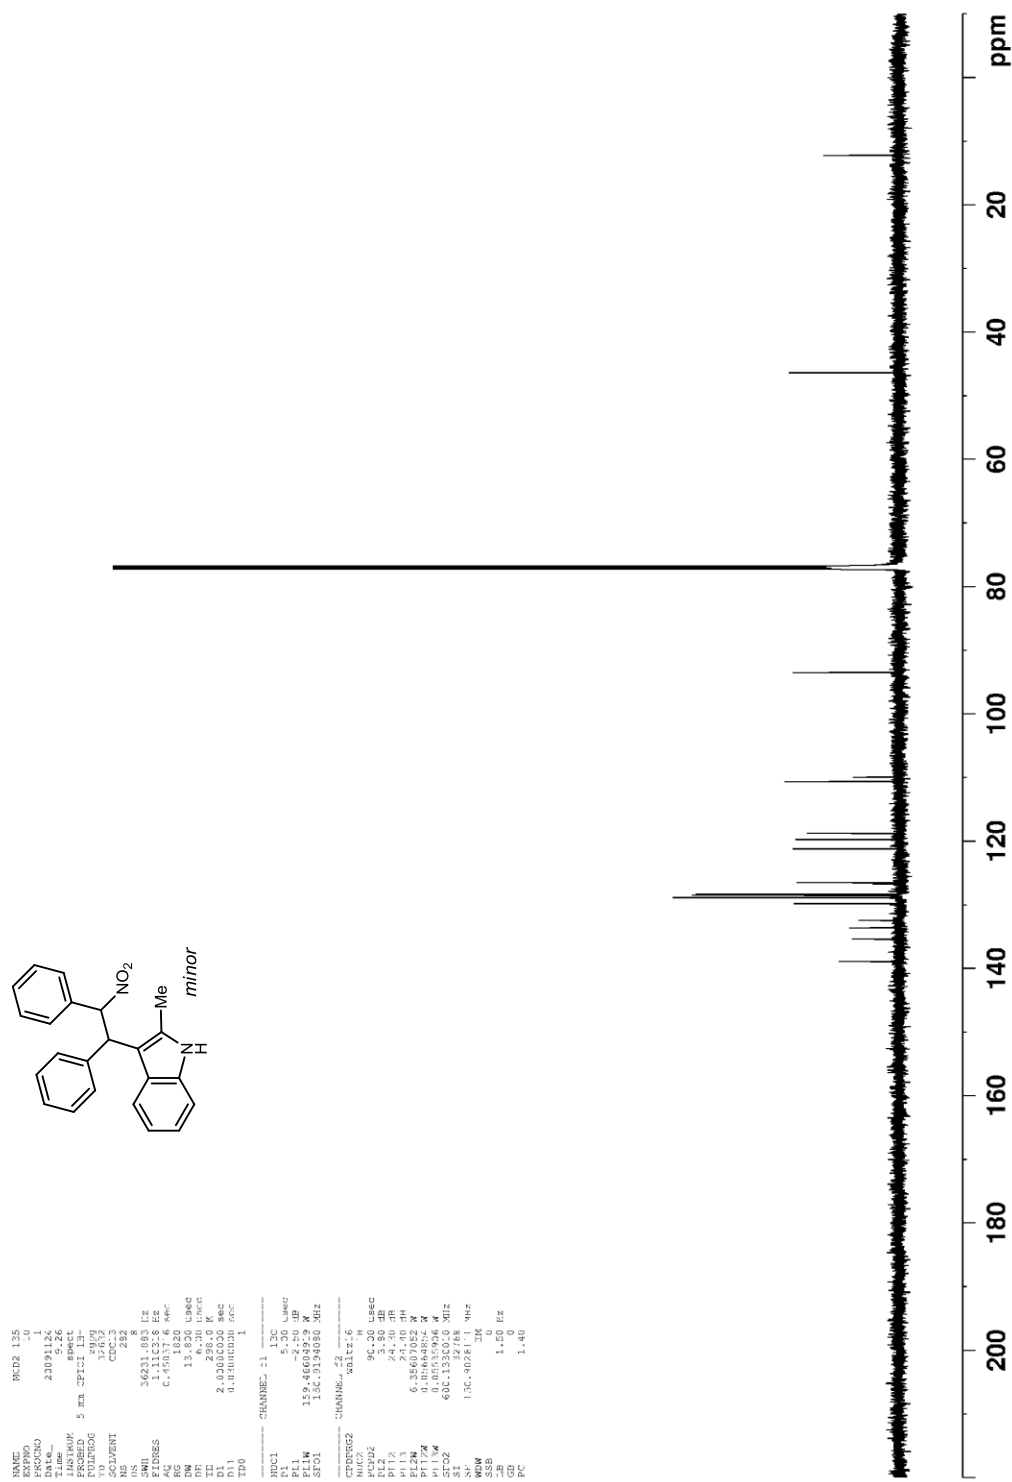

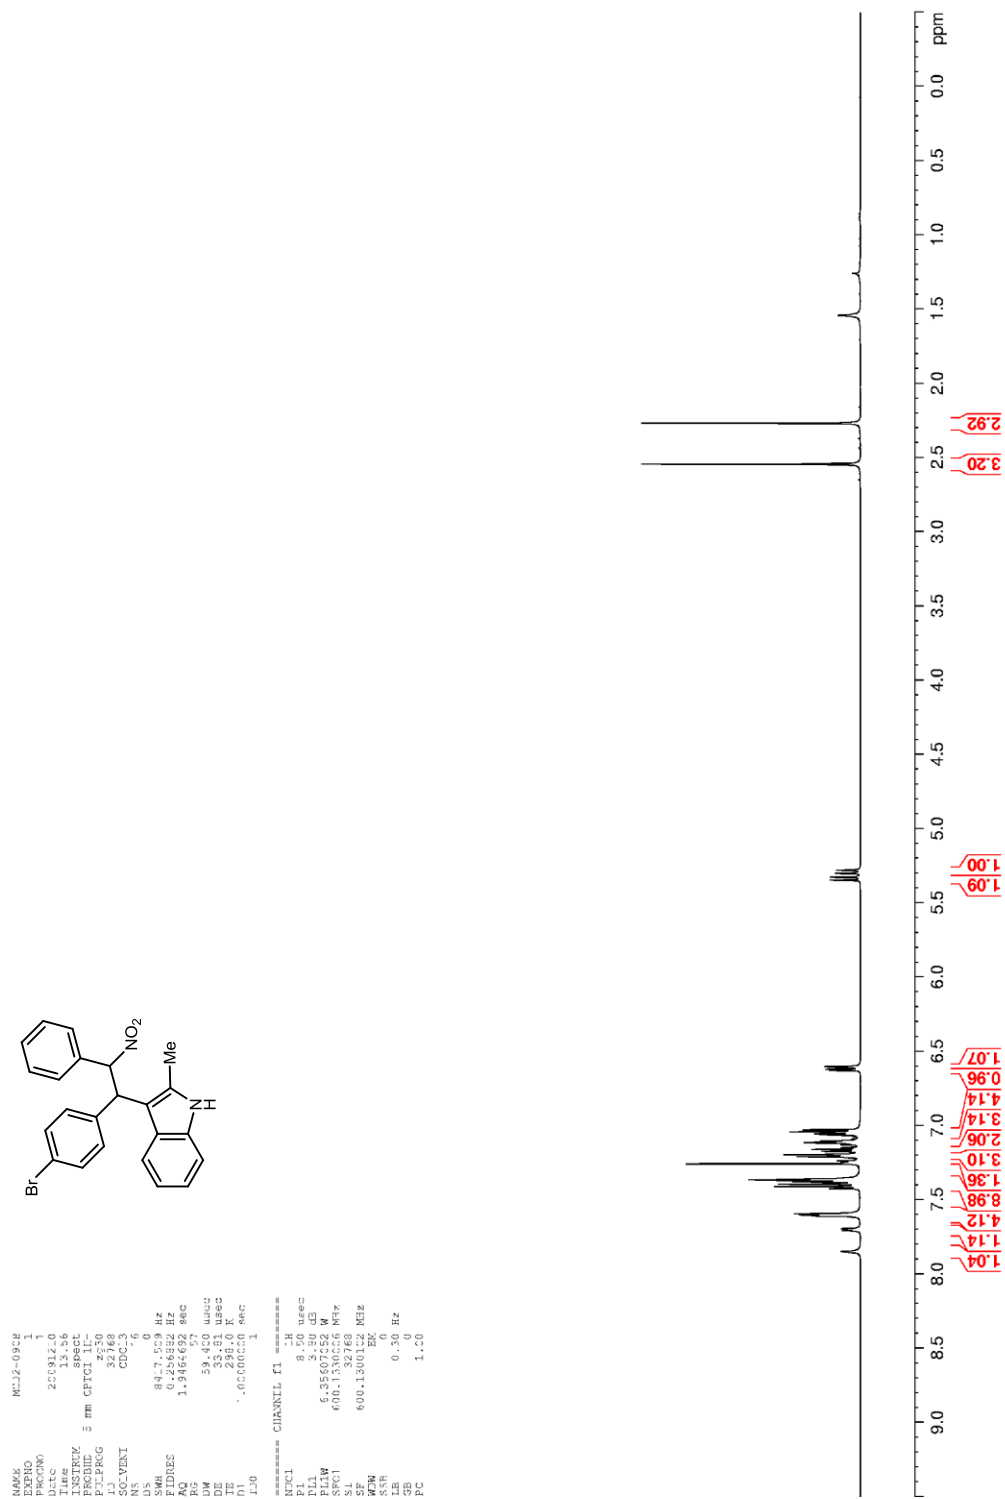

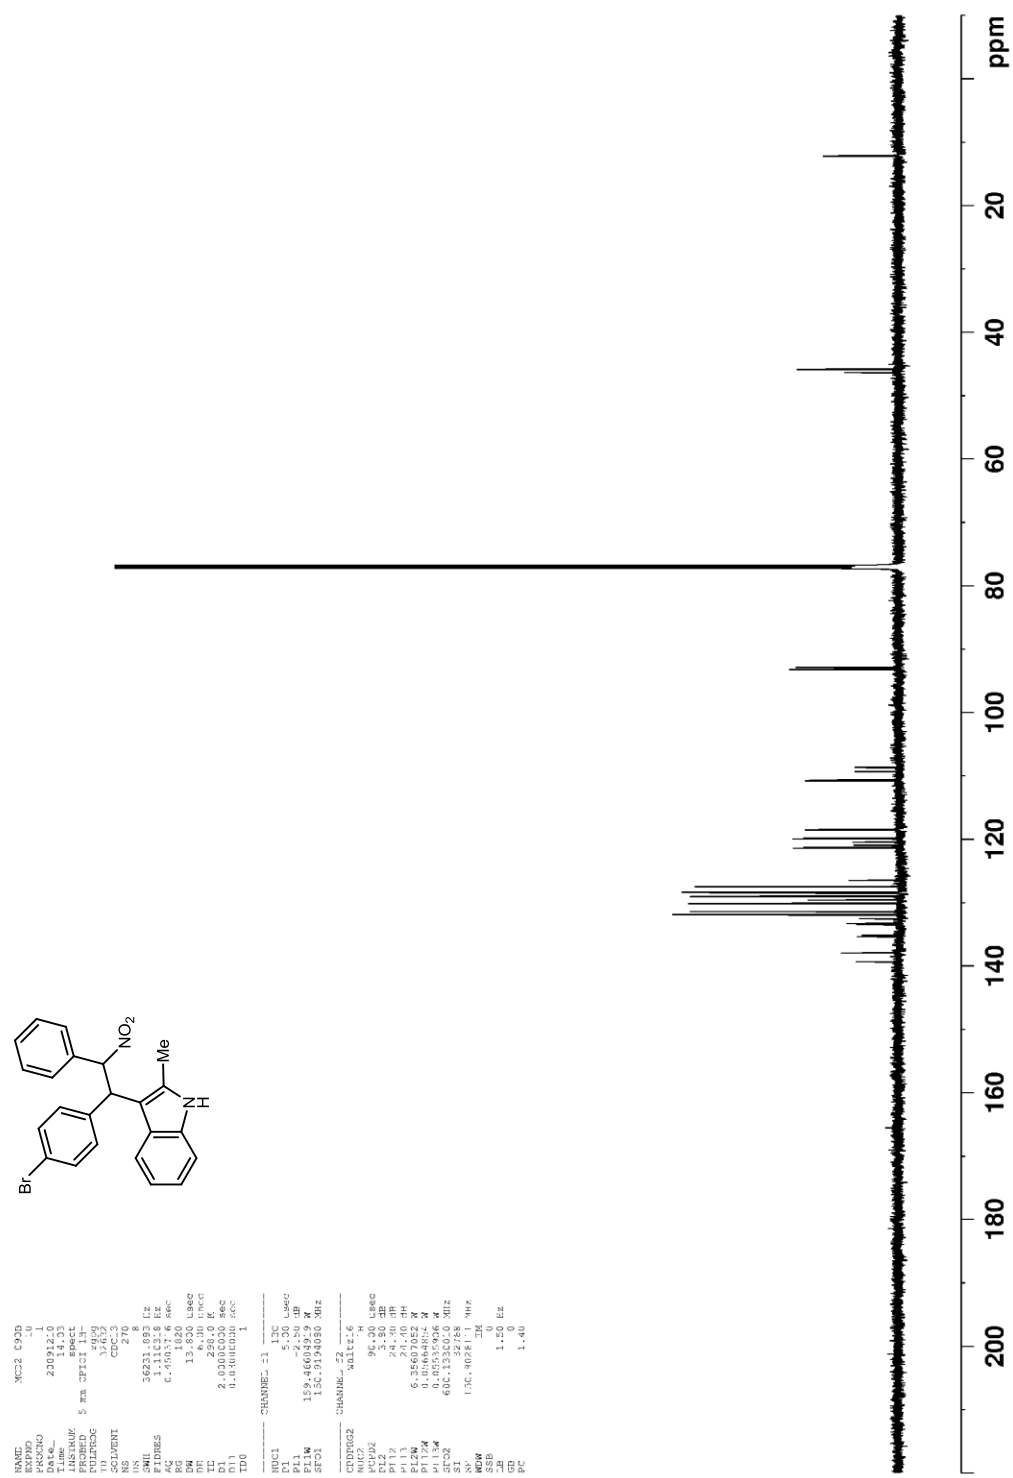



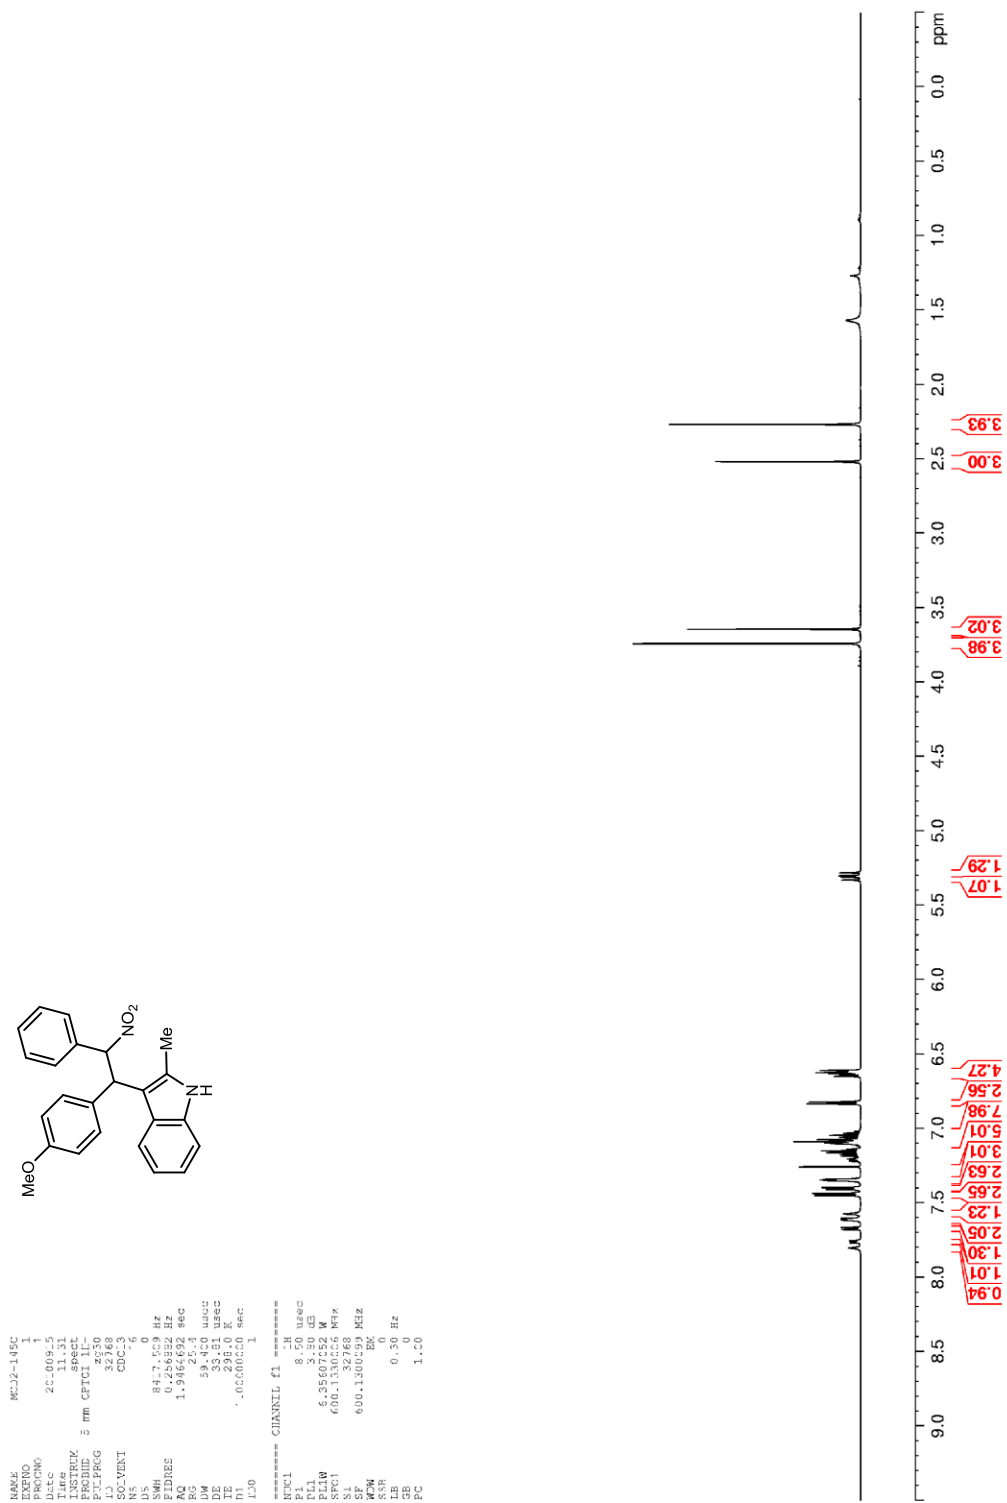

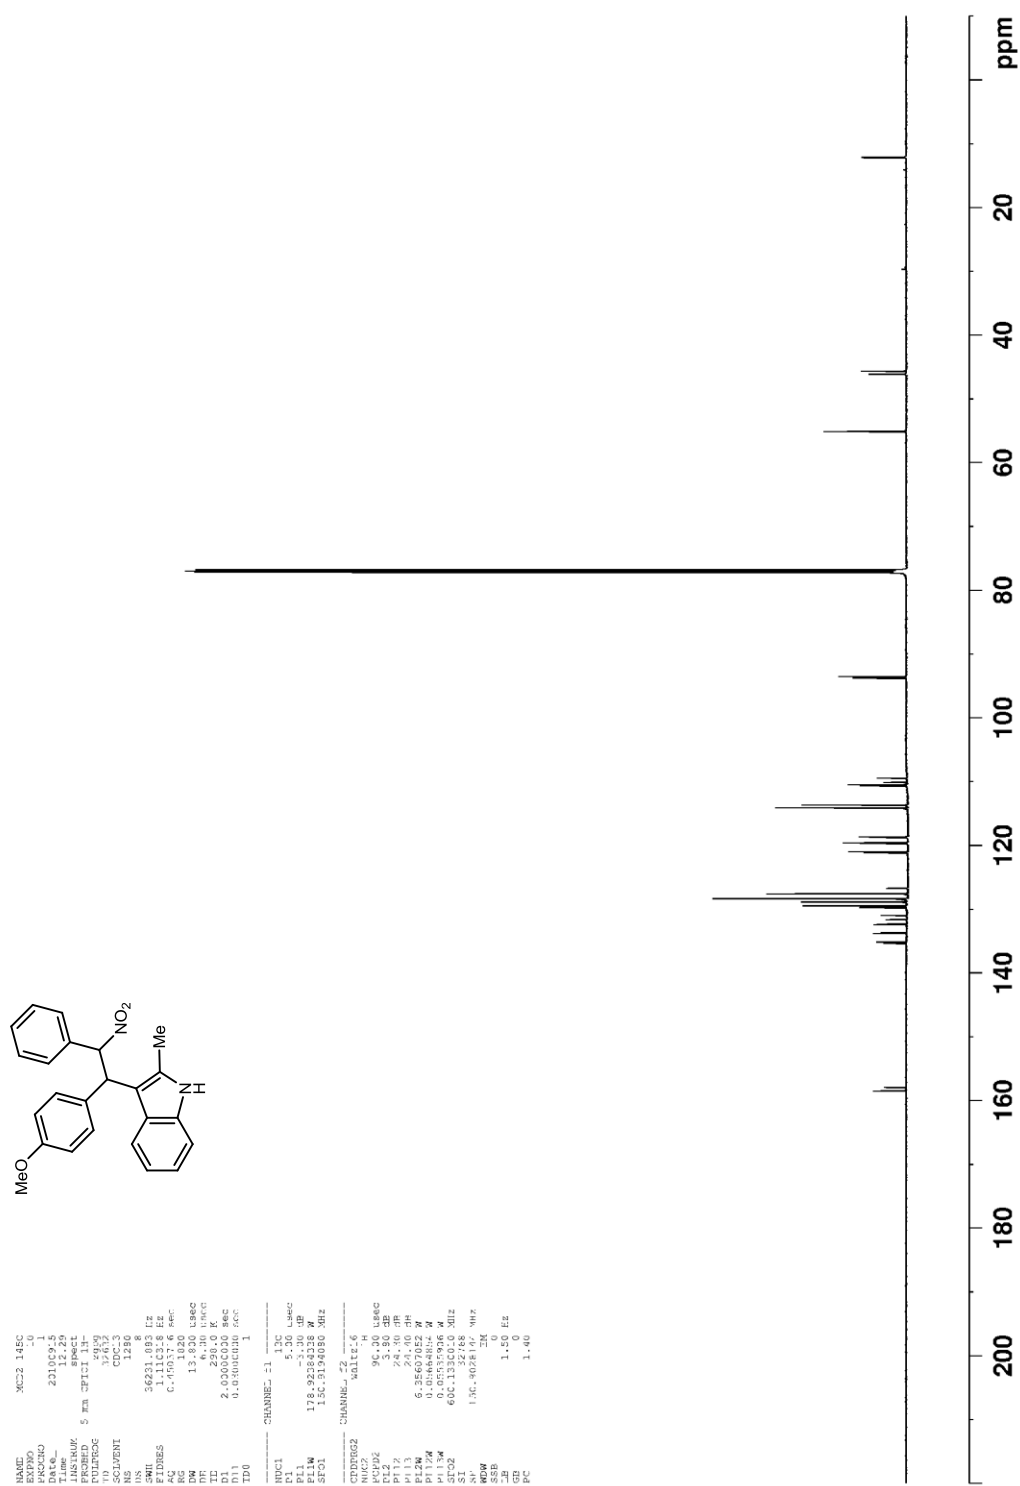

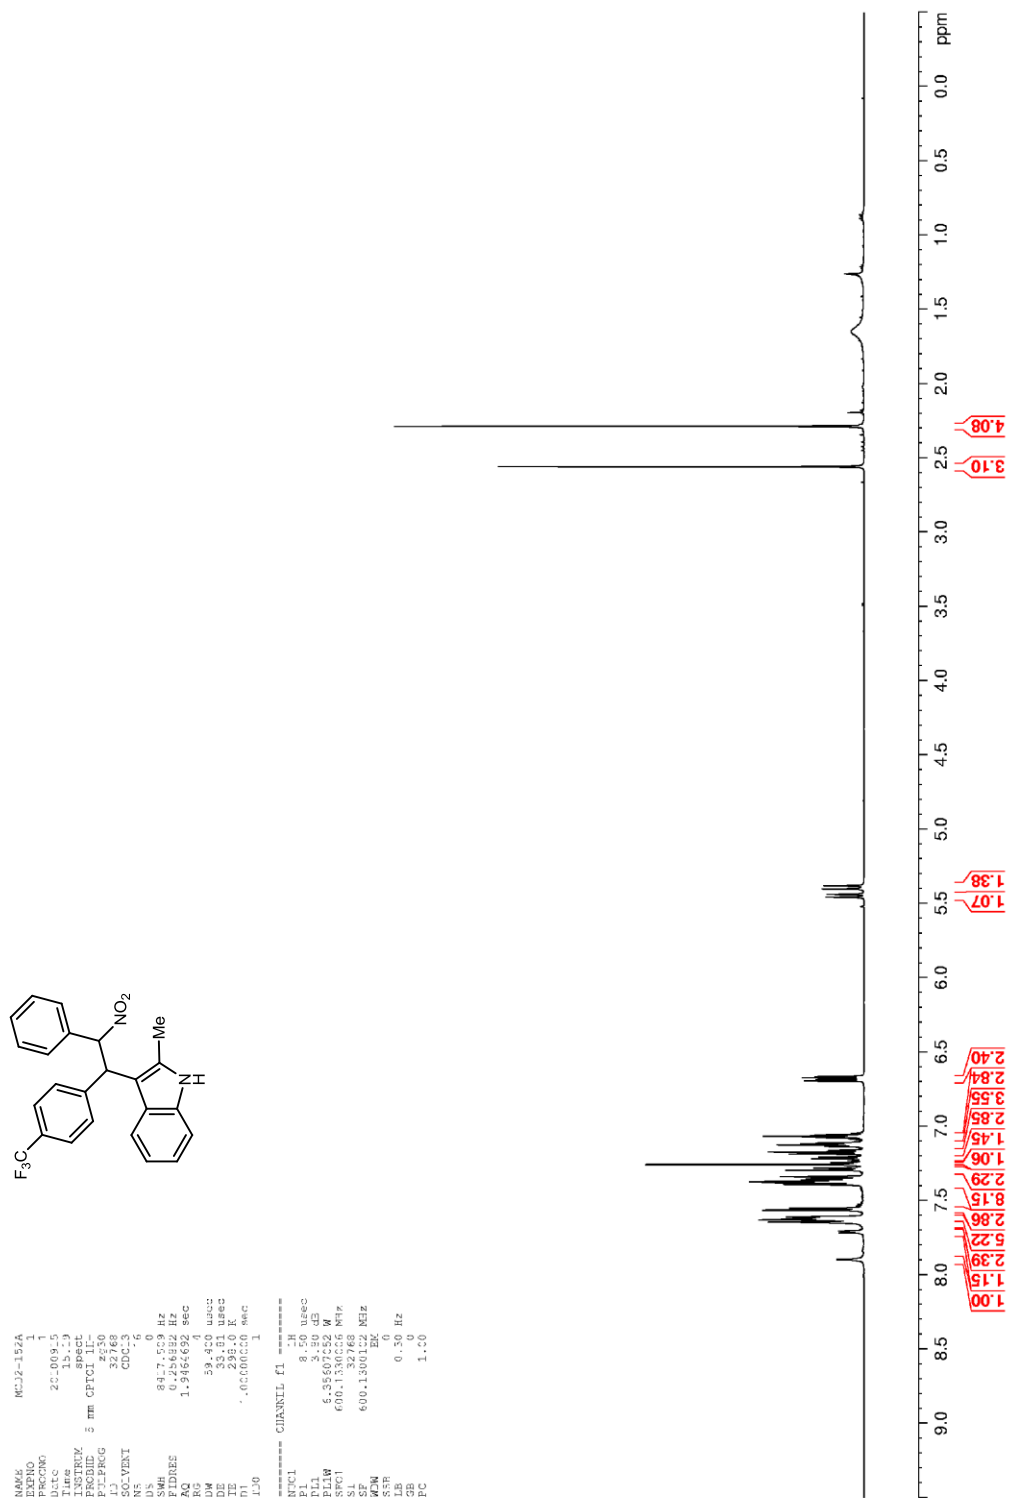

**Figure 26.**  $^{13}\text{C}$  NMR ( $\text{CDCl}_3$ ) of 6d.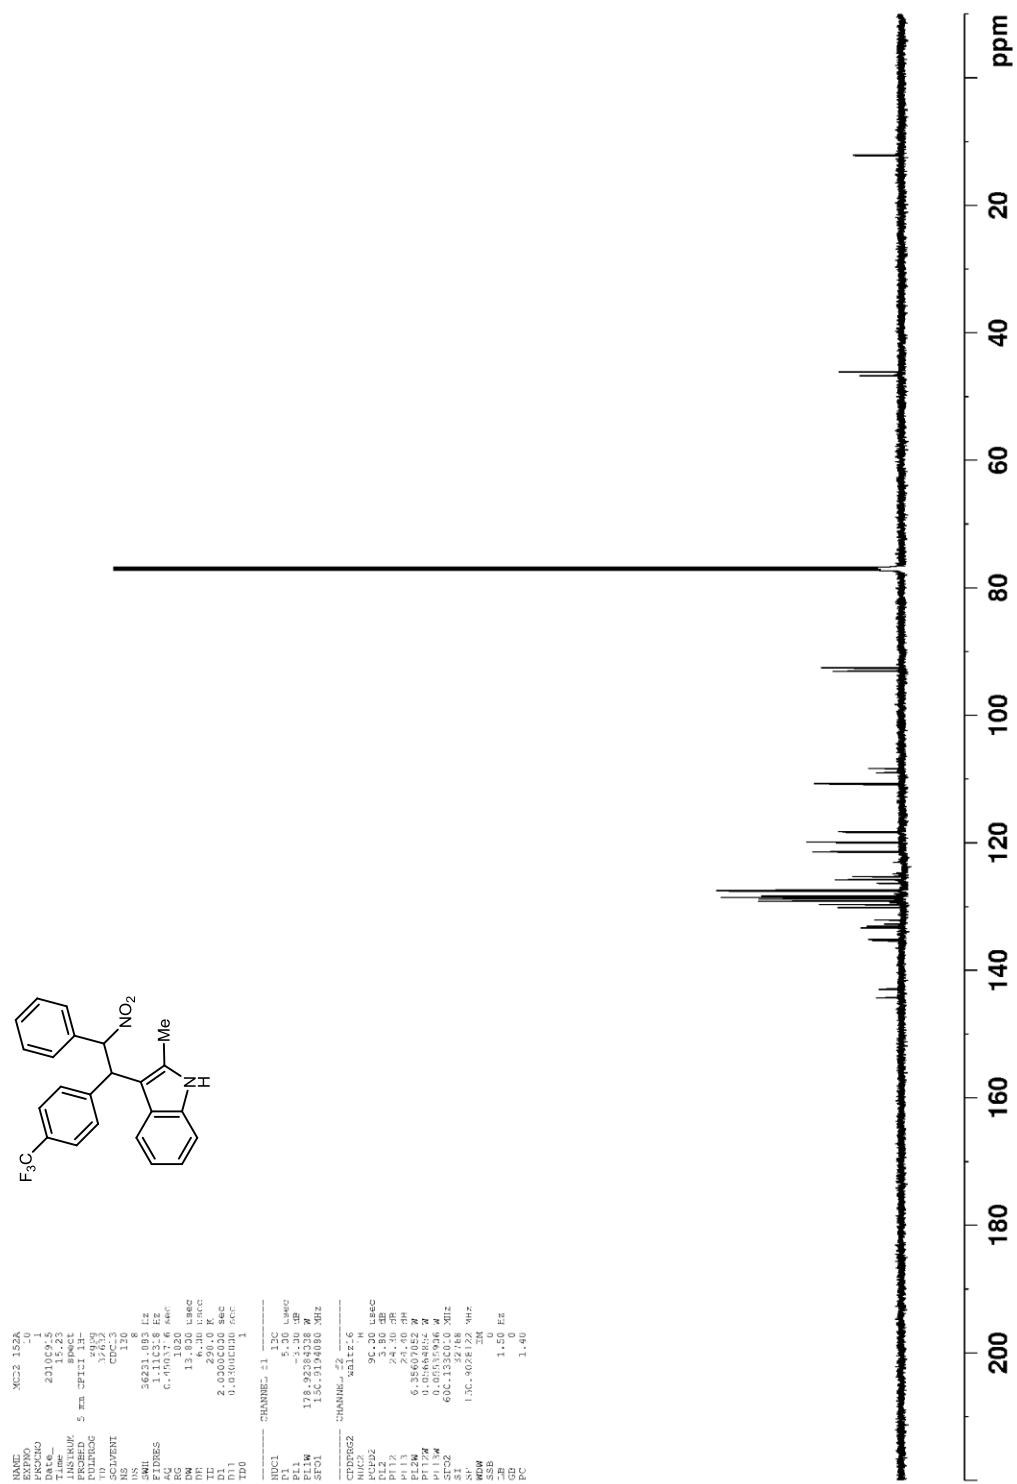

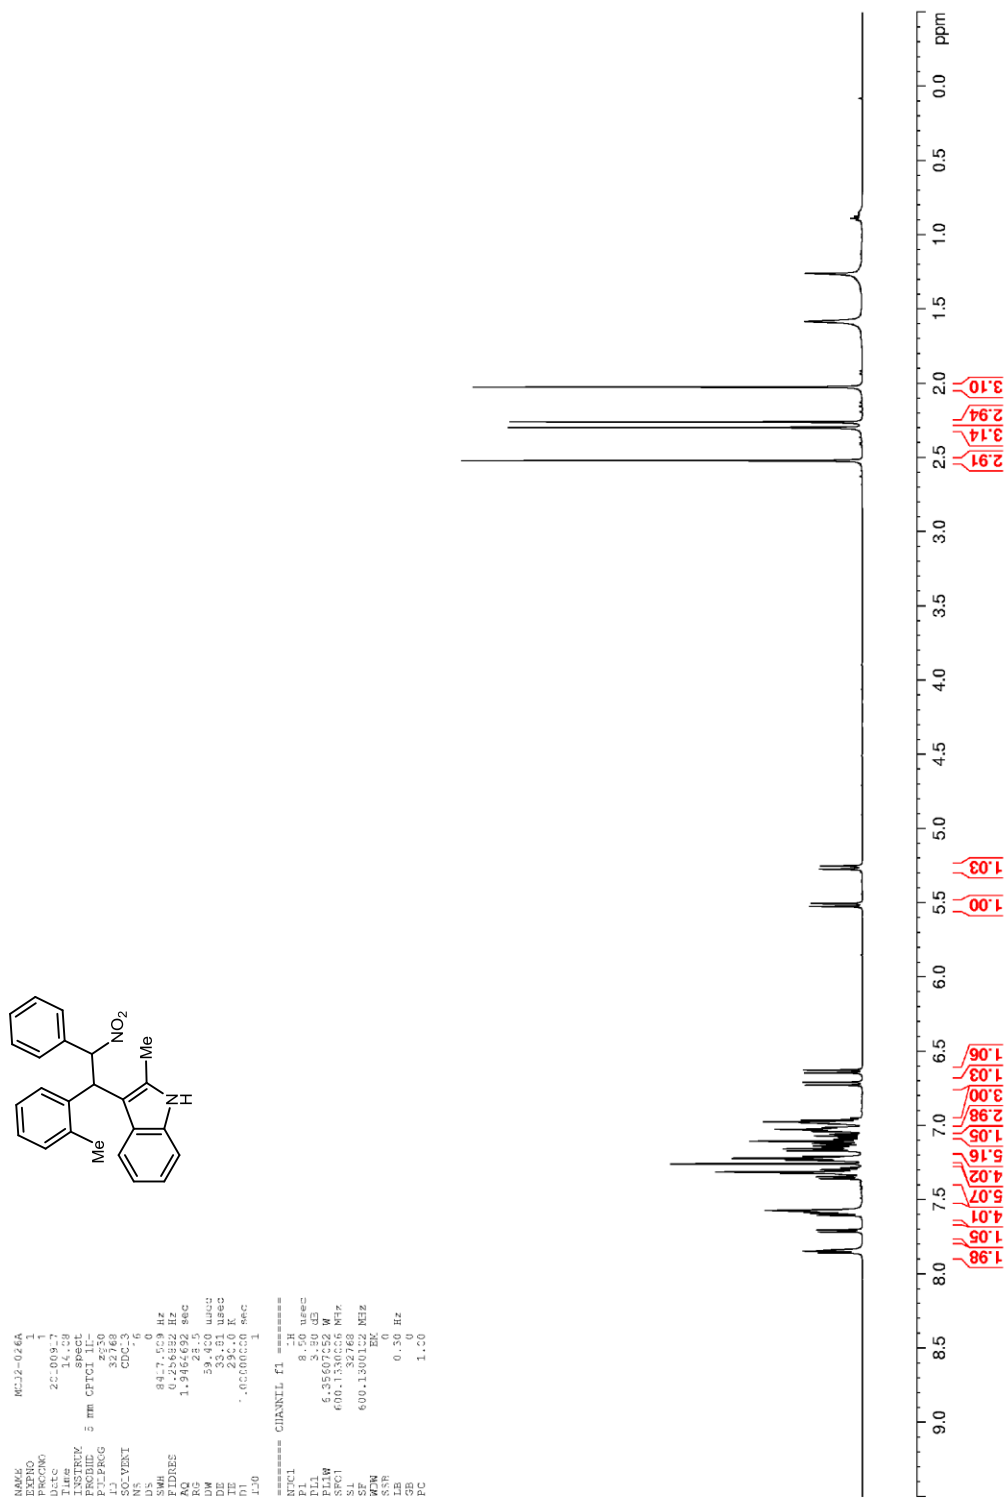

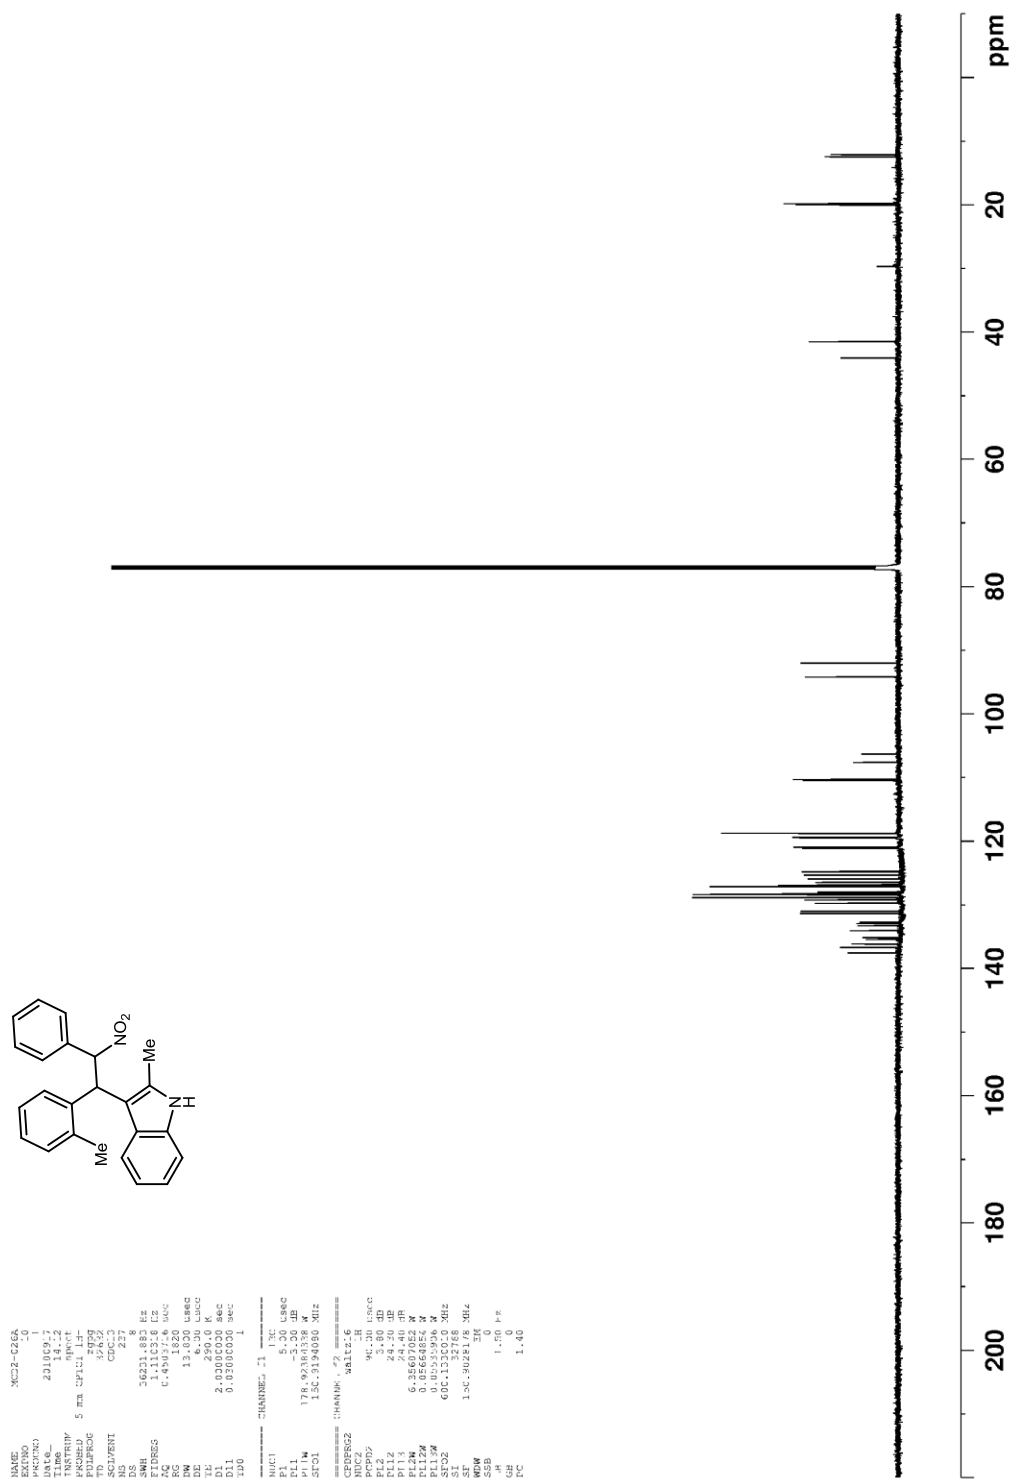

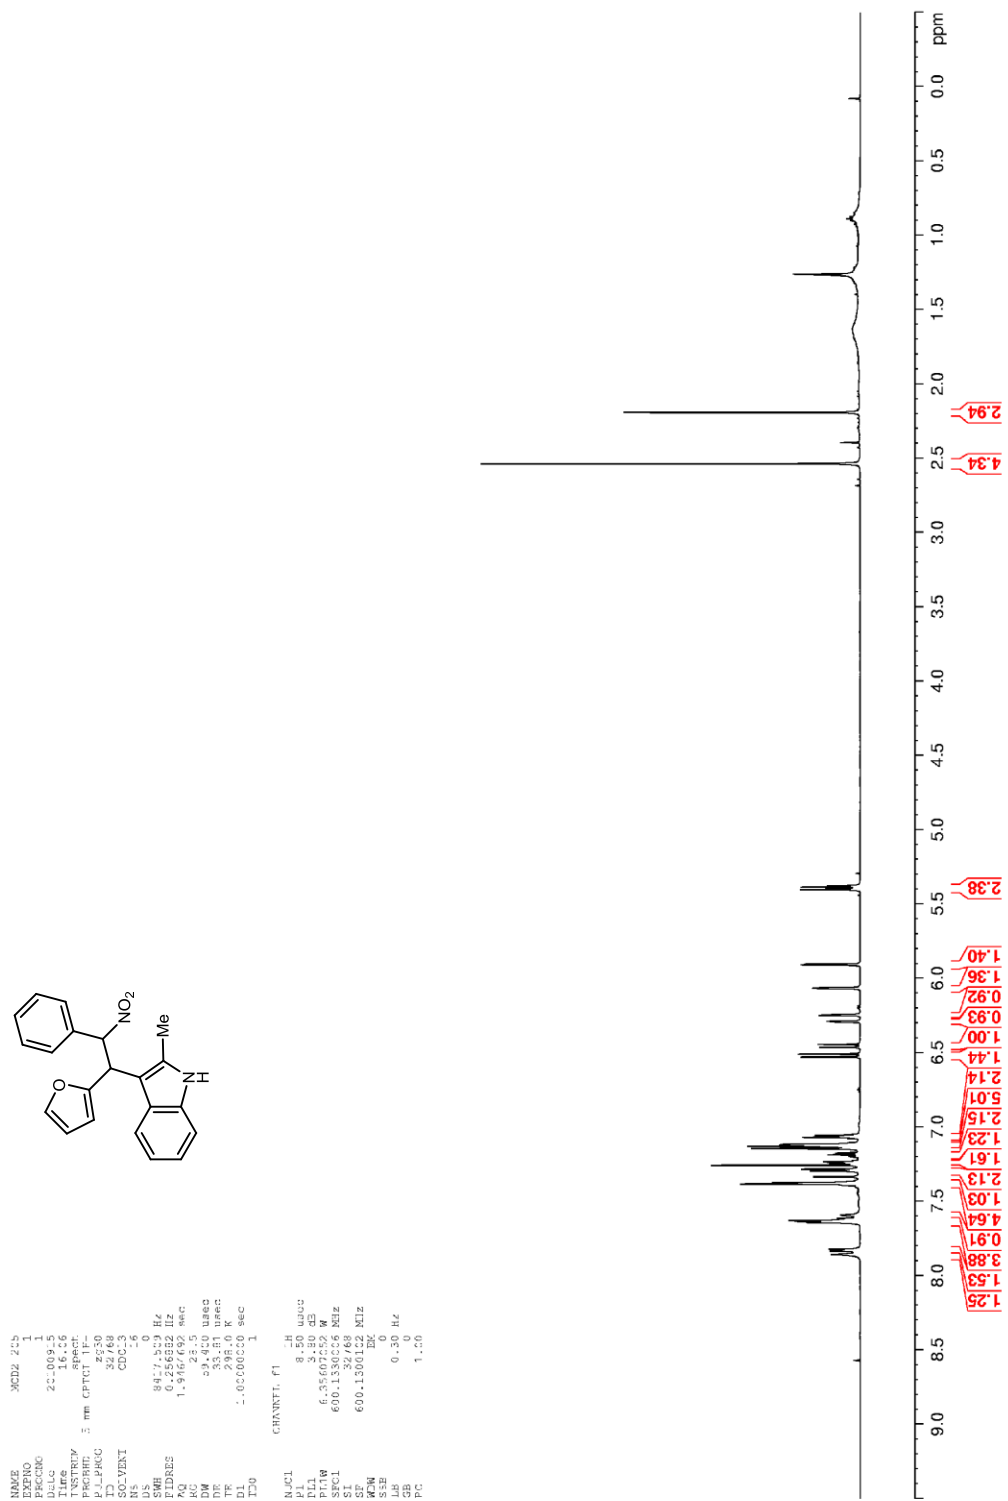





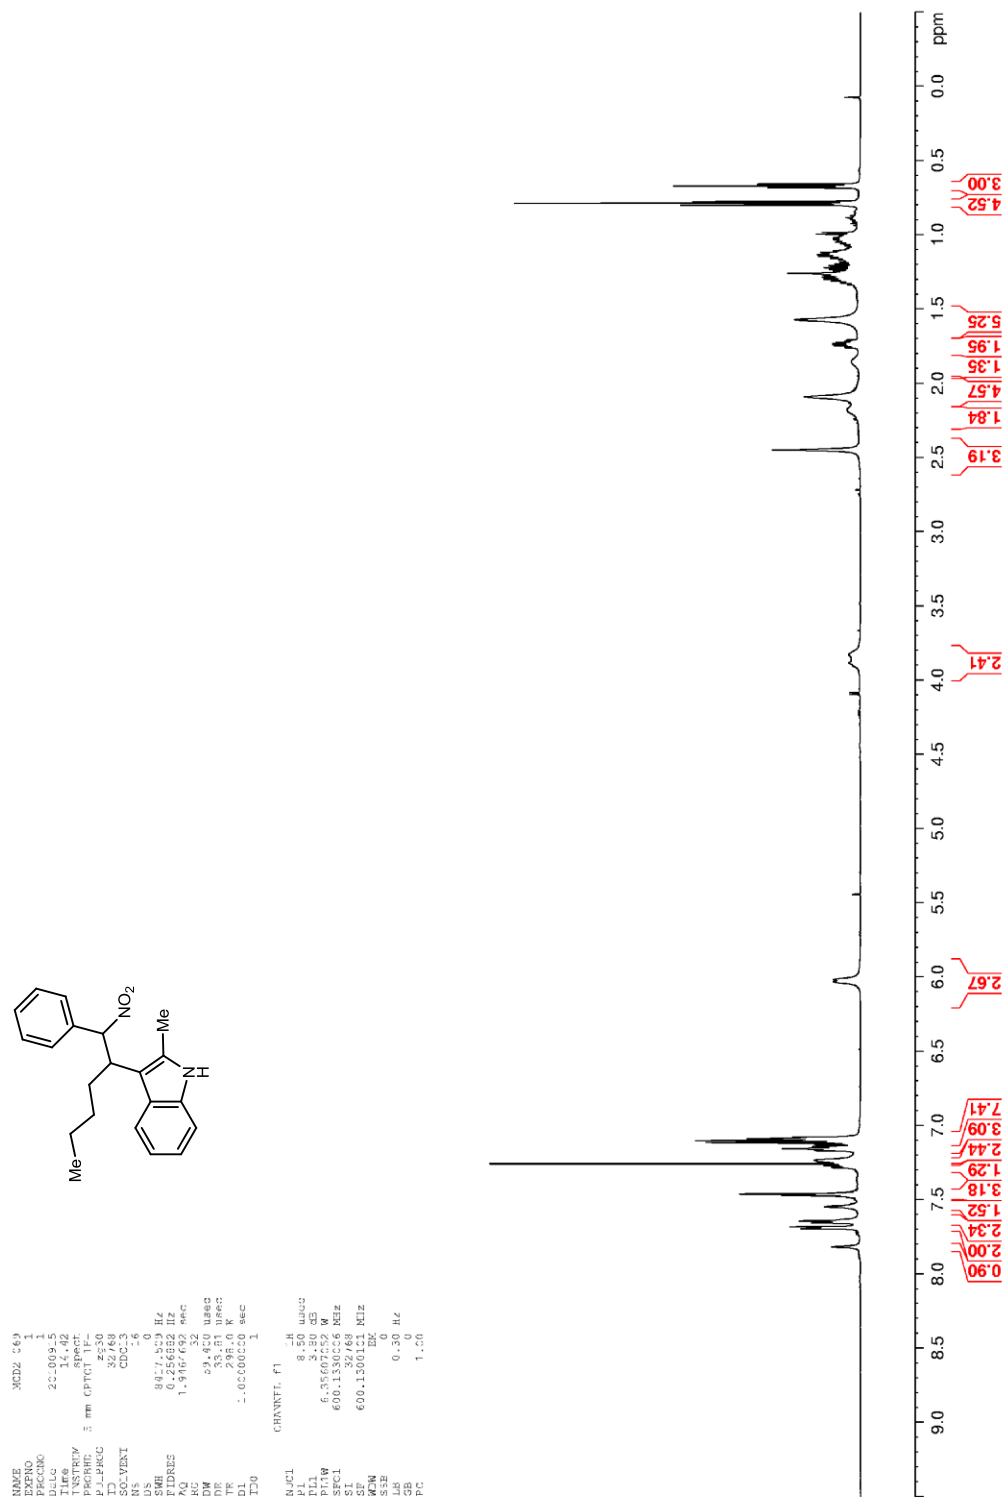

Figure 32.  $^{13}\text{C}$  NMR ( $\text{CDCl}_3$ ) of 6g.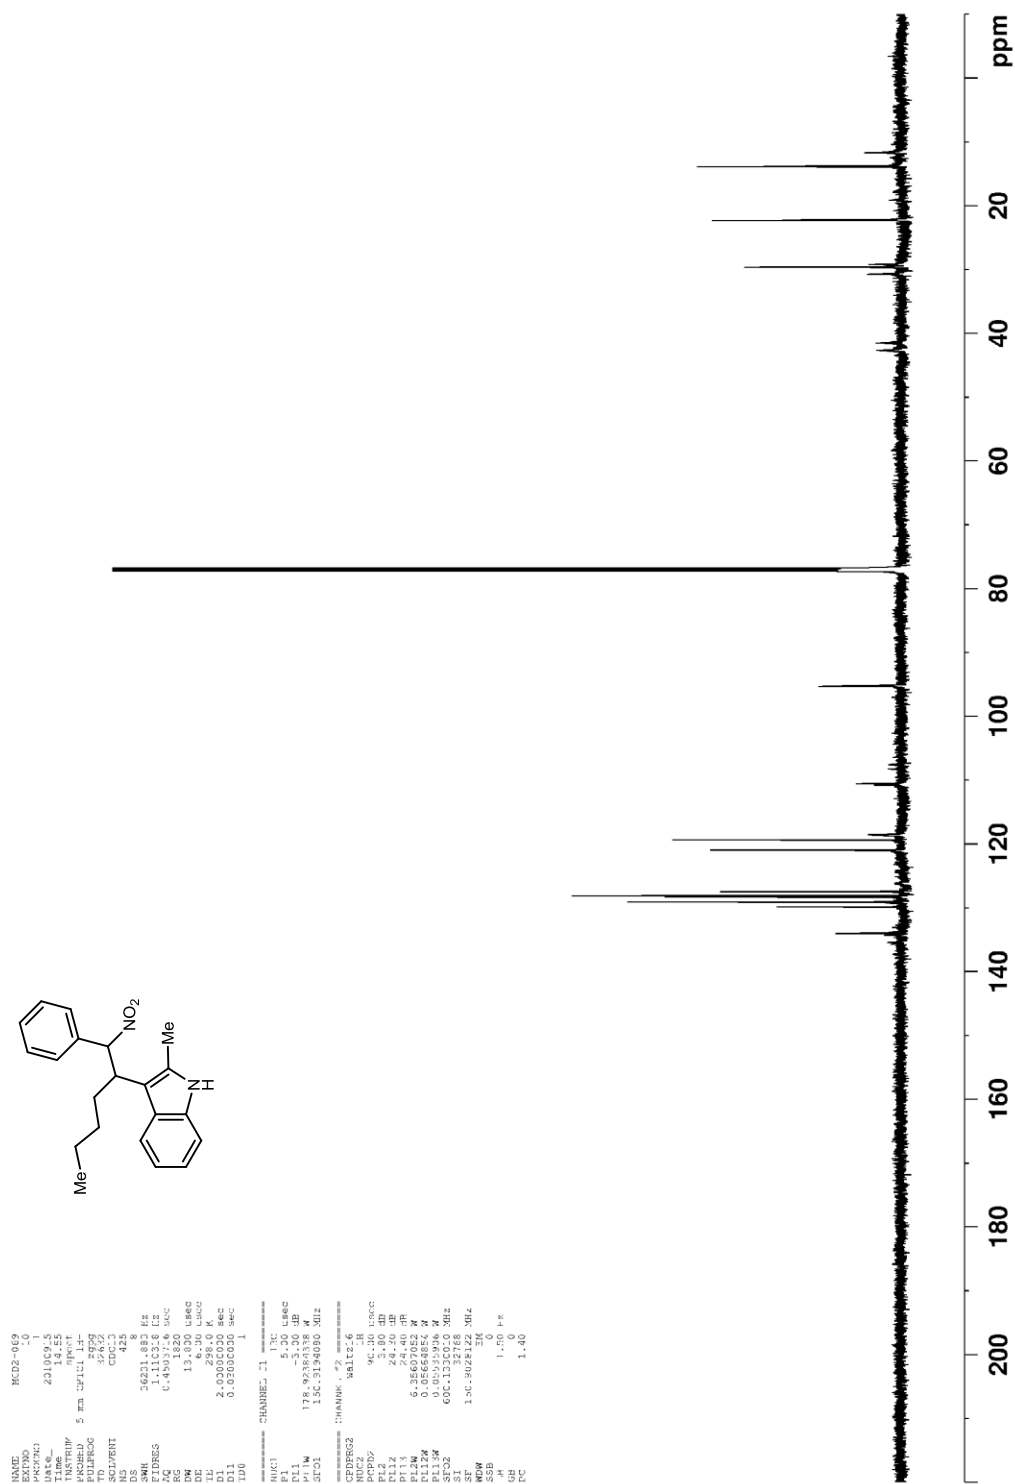

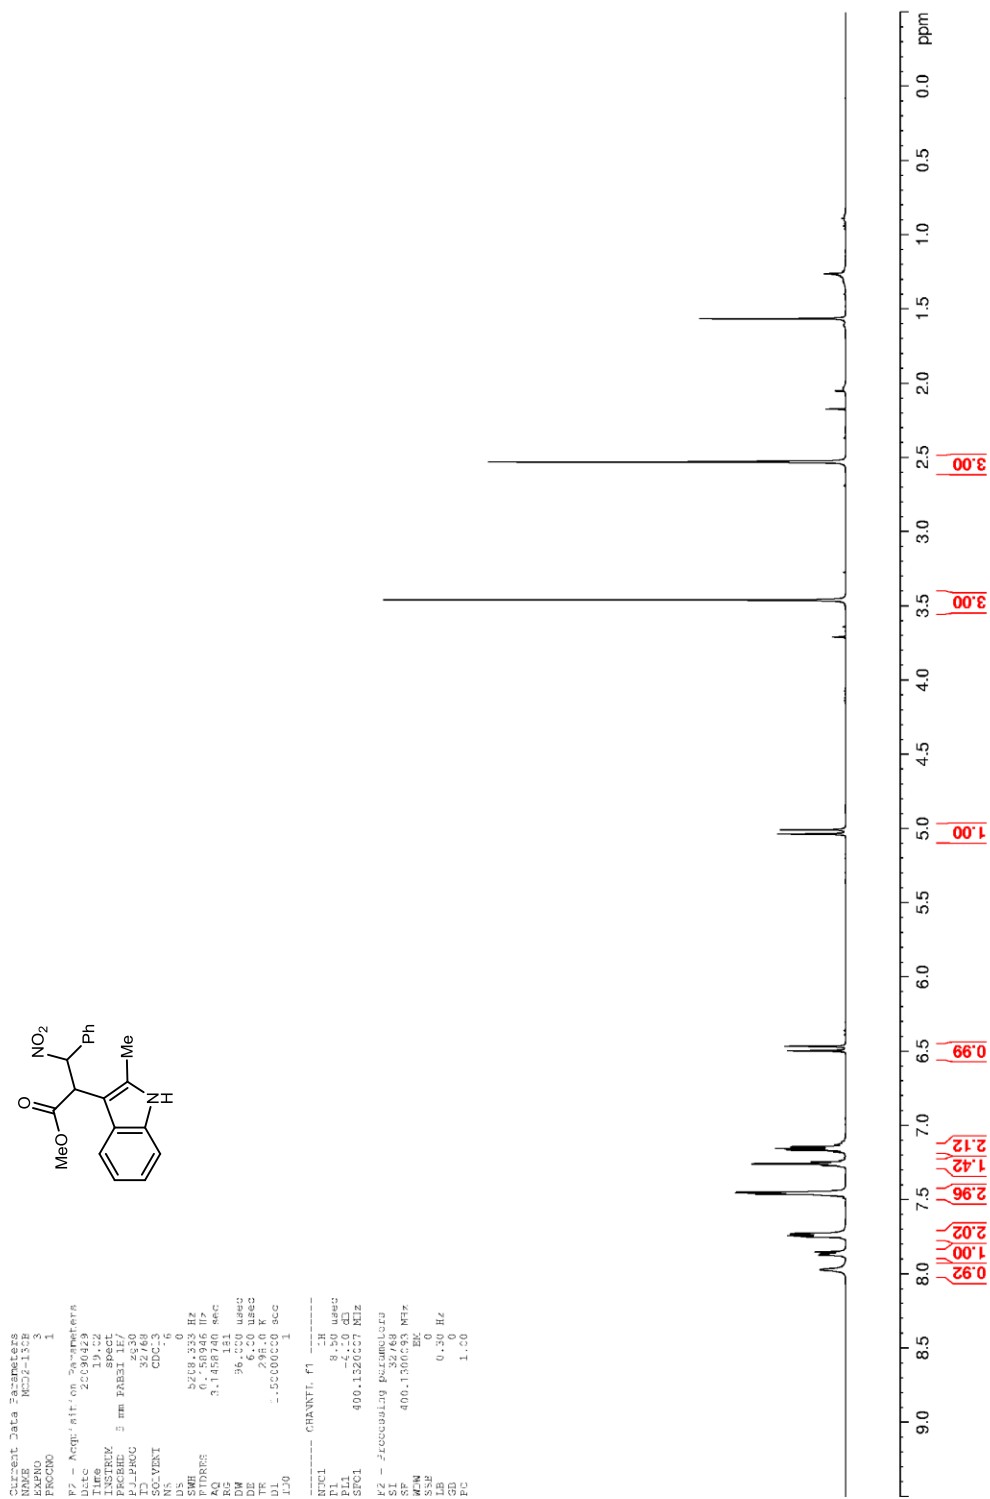

Figure 34. <sup>13</sup>C NMR (CDCl<sub>3</sub>) of 6h.

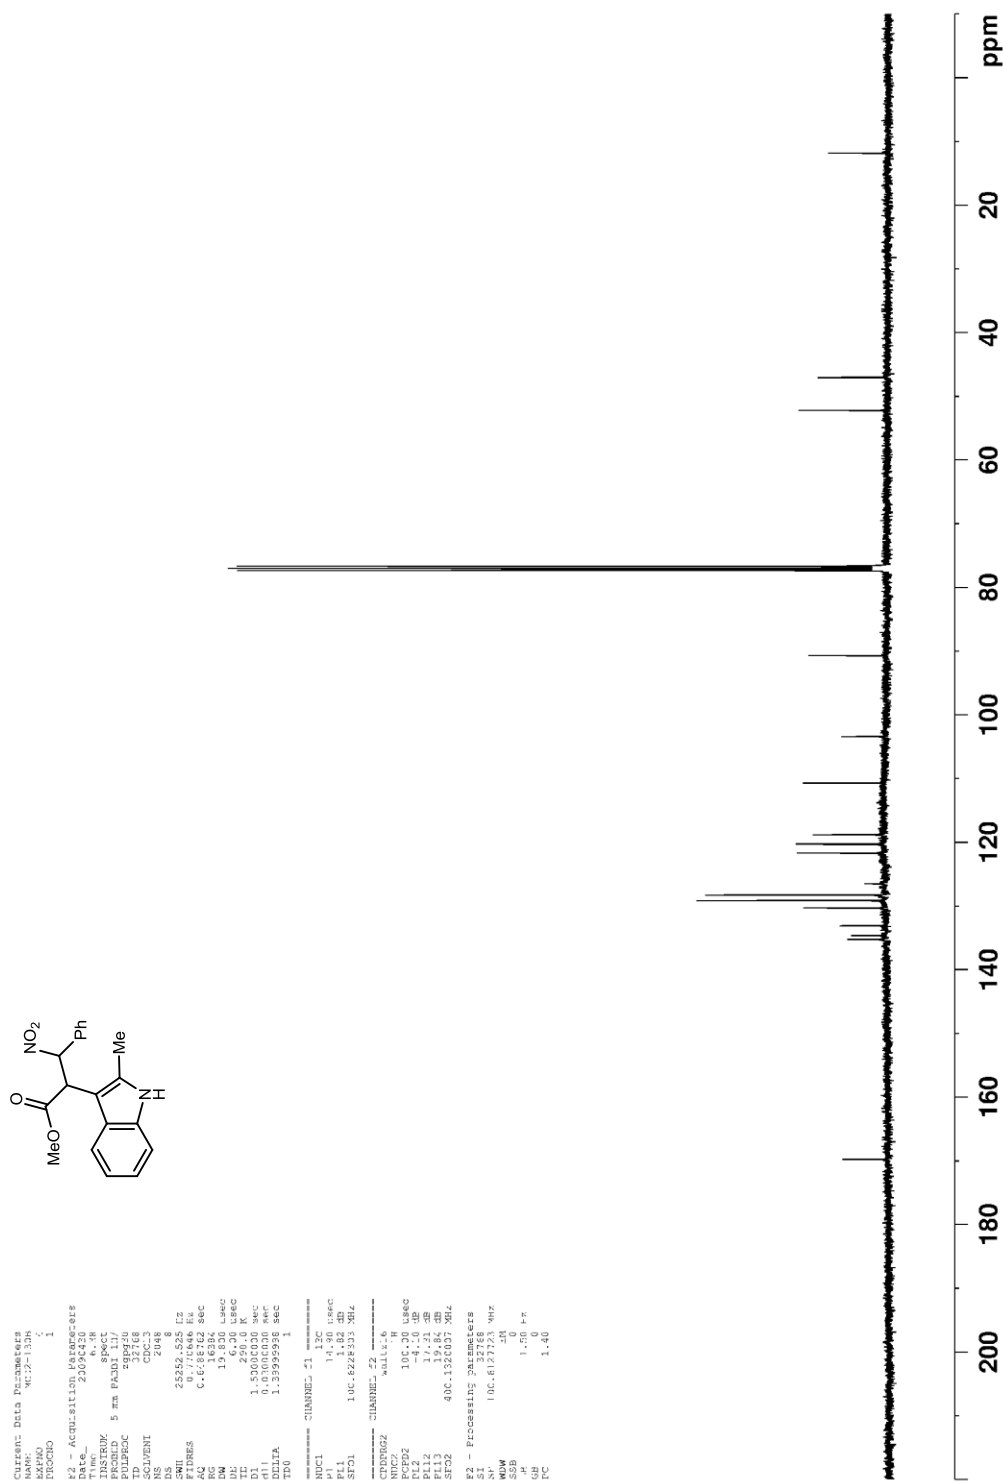

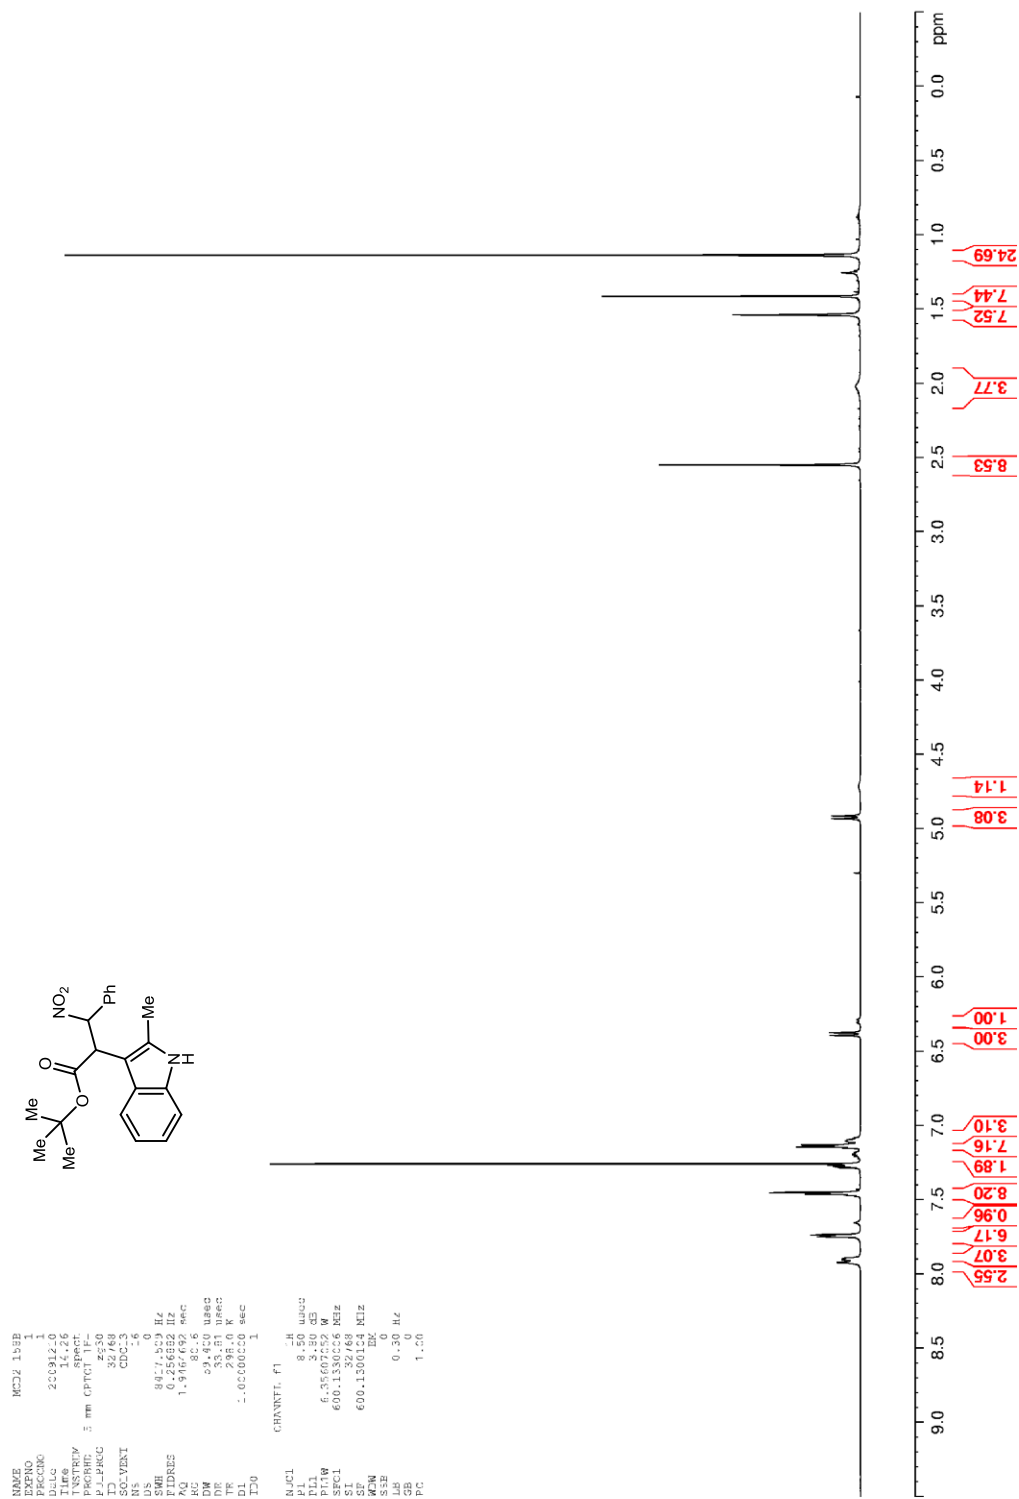

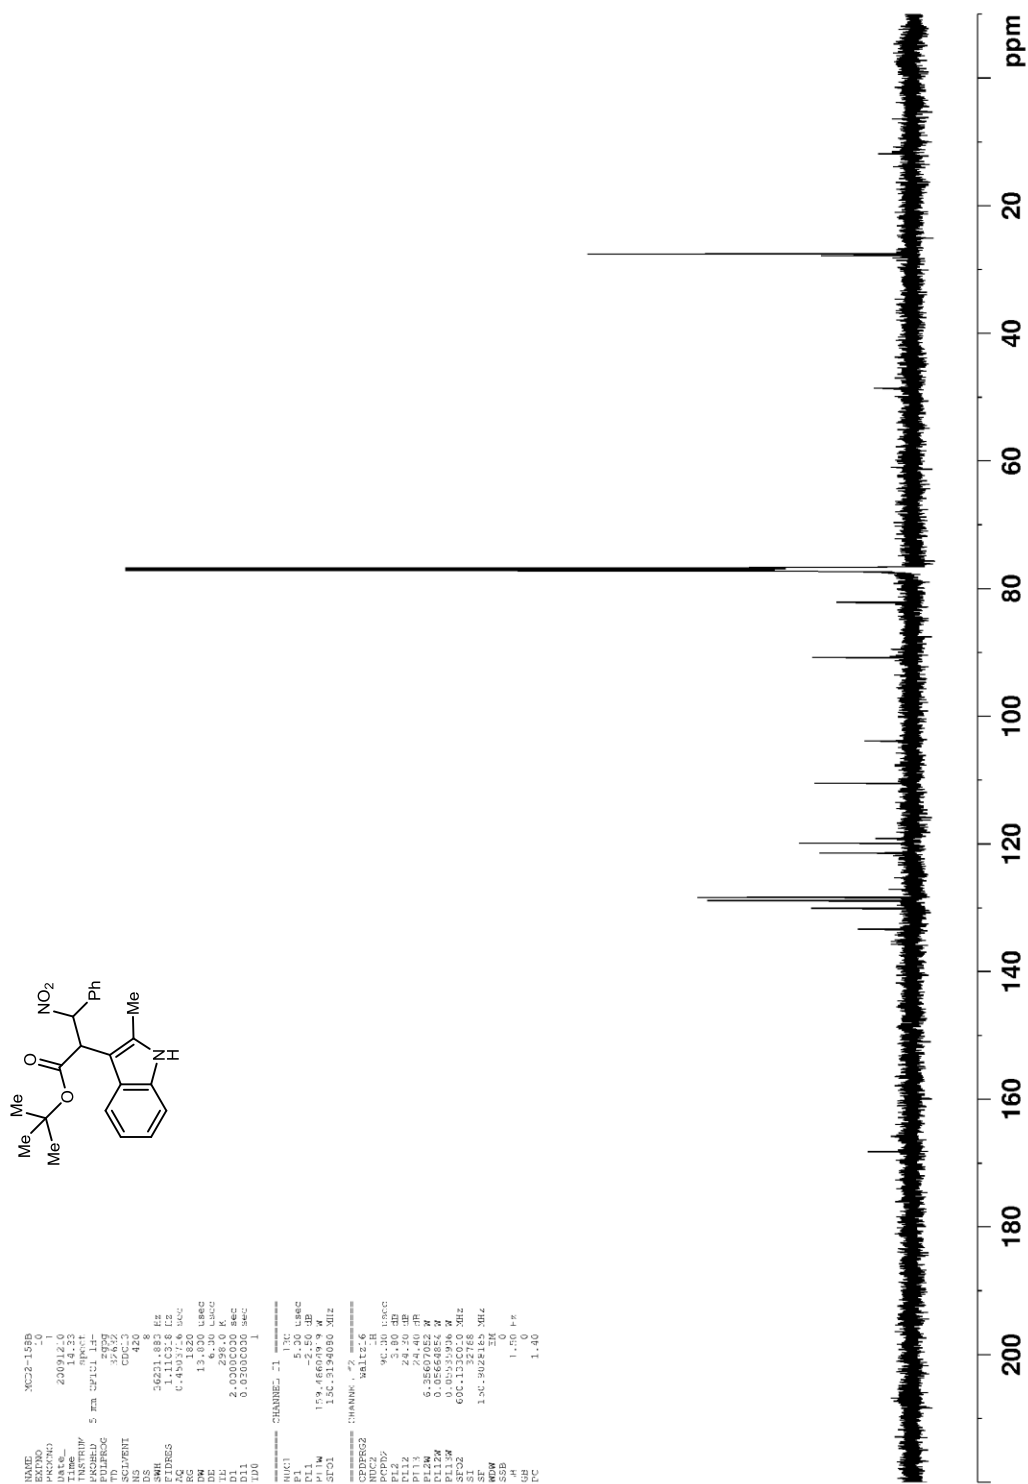

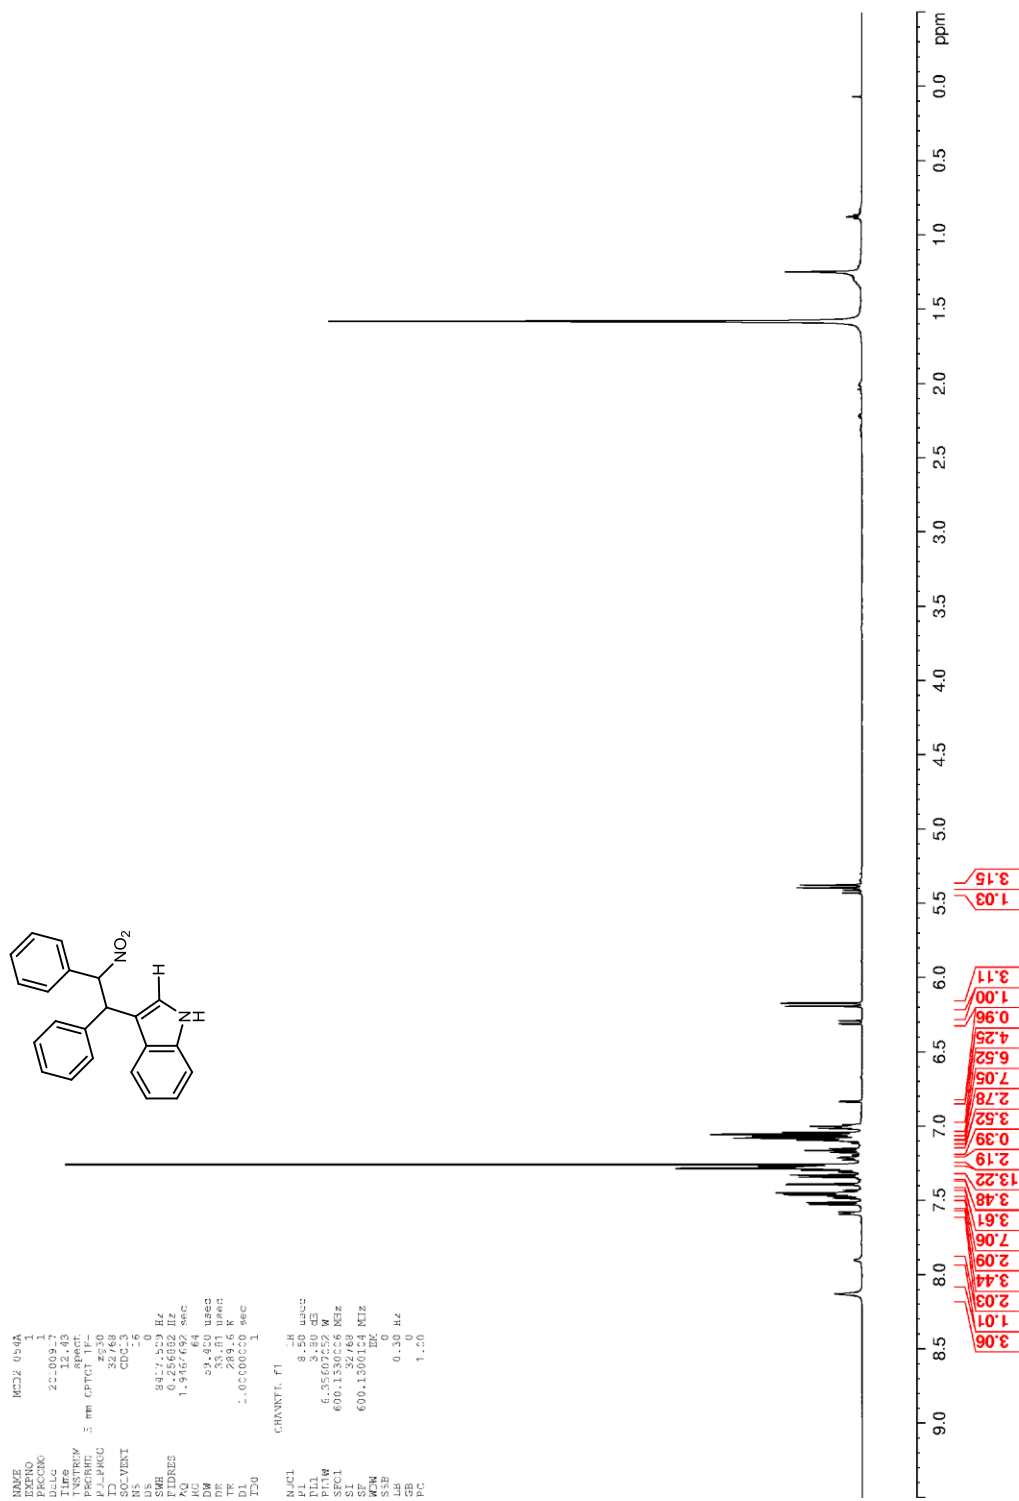





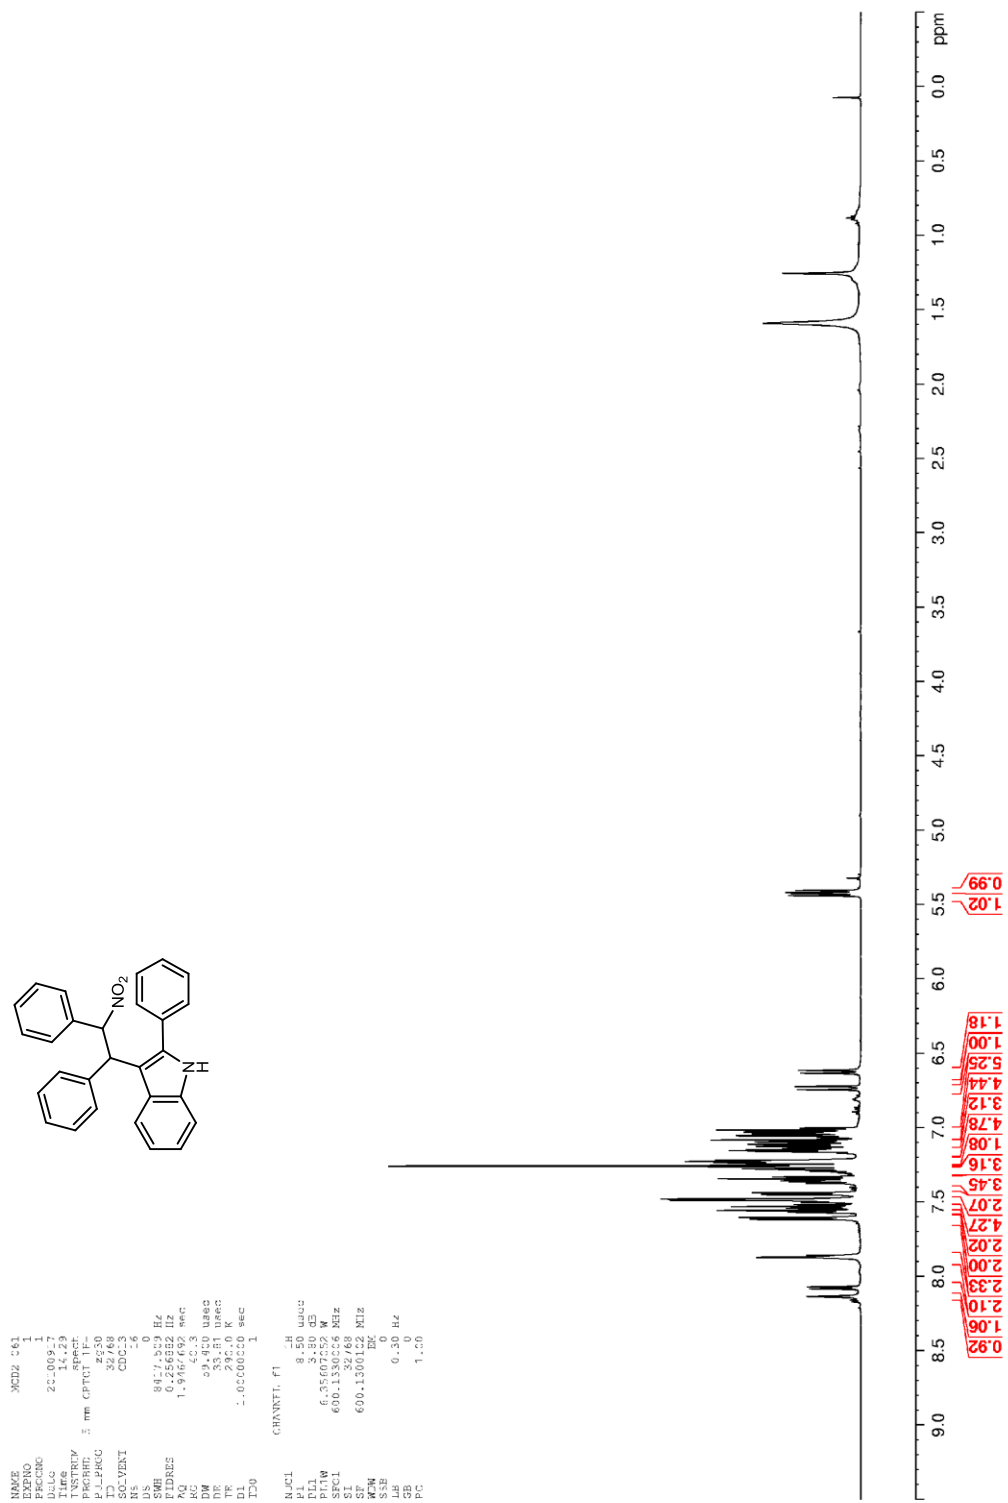

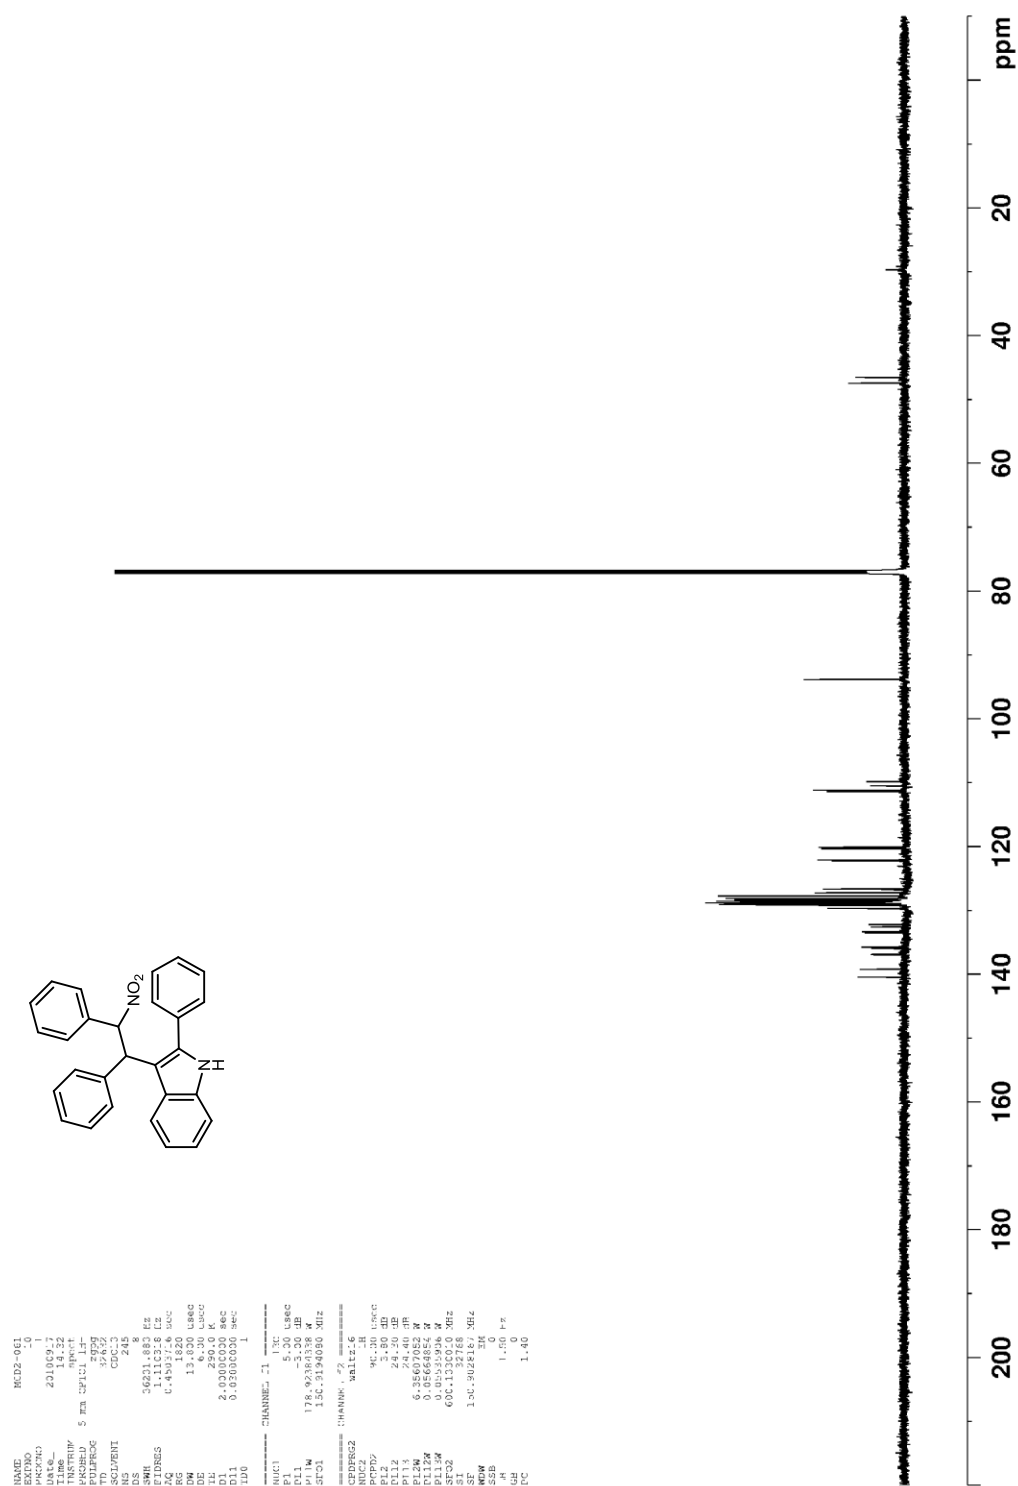

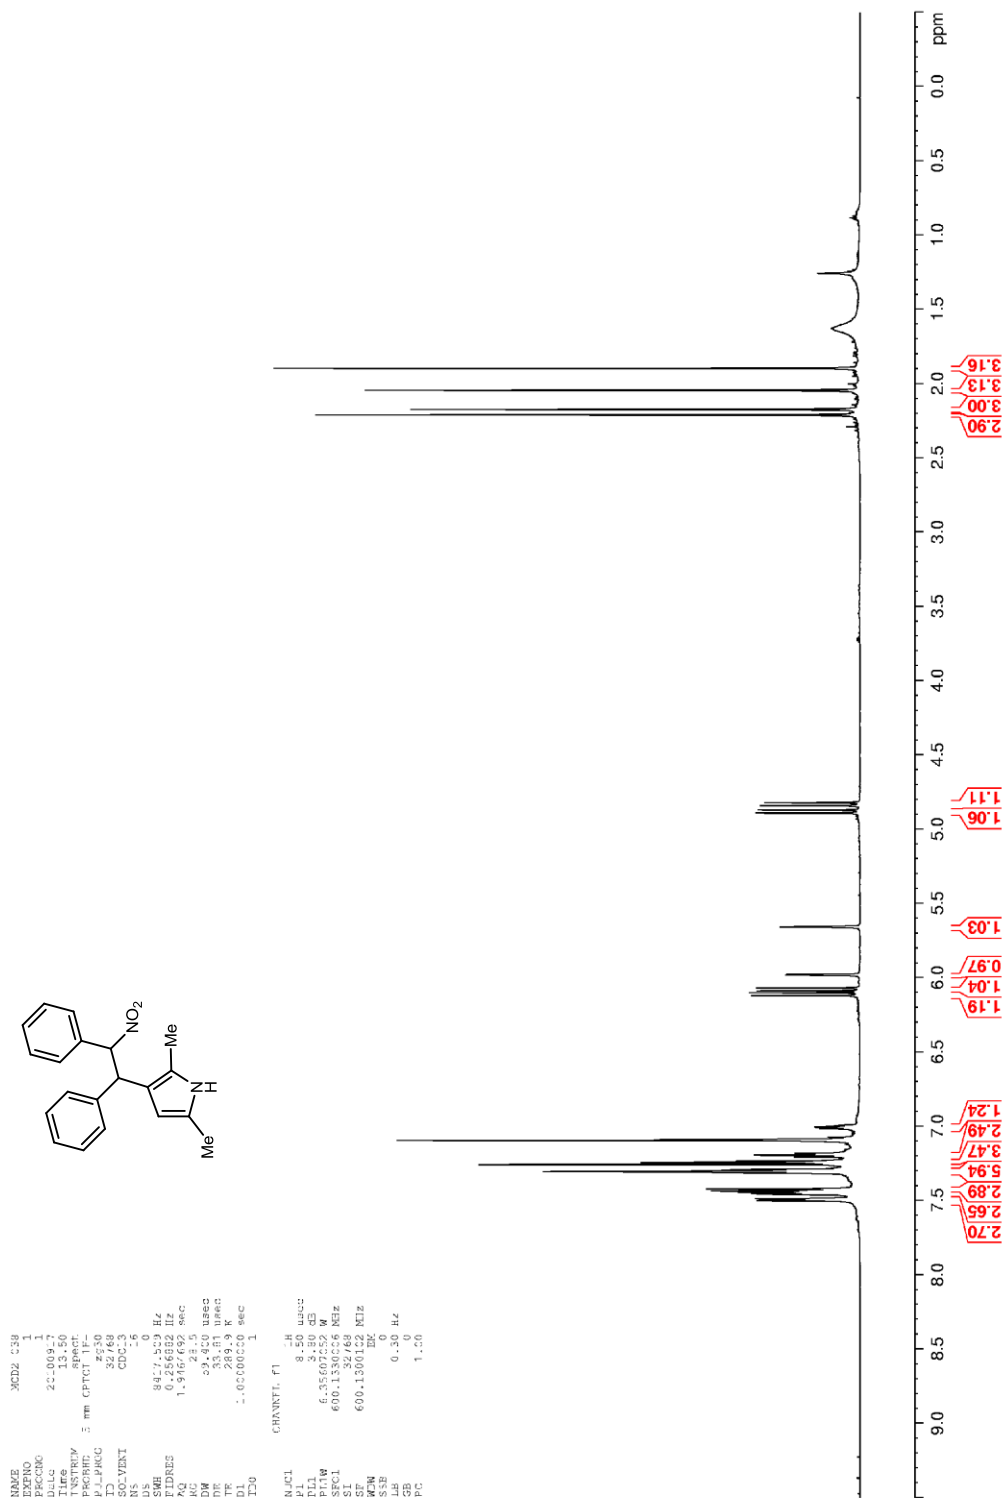



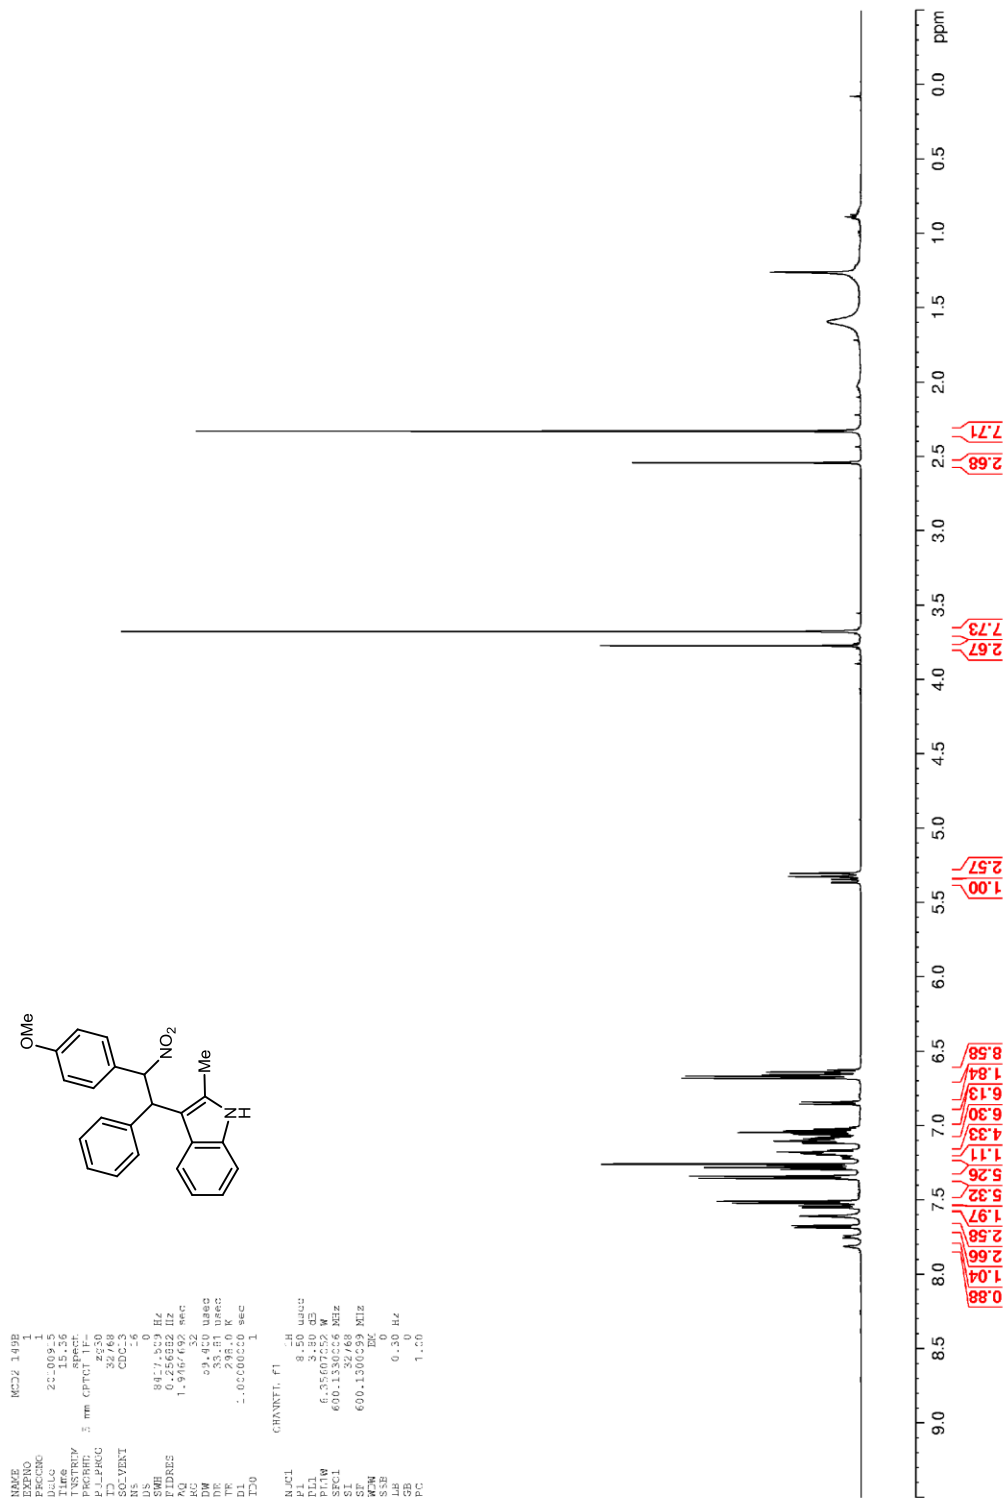



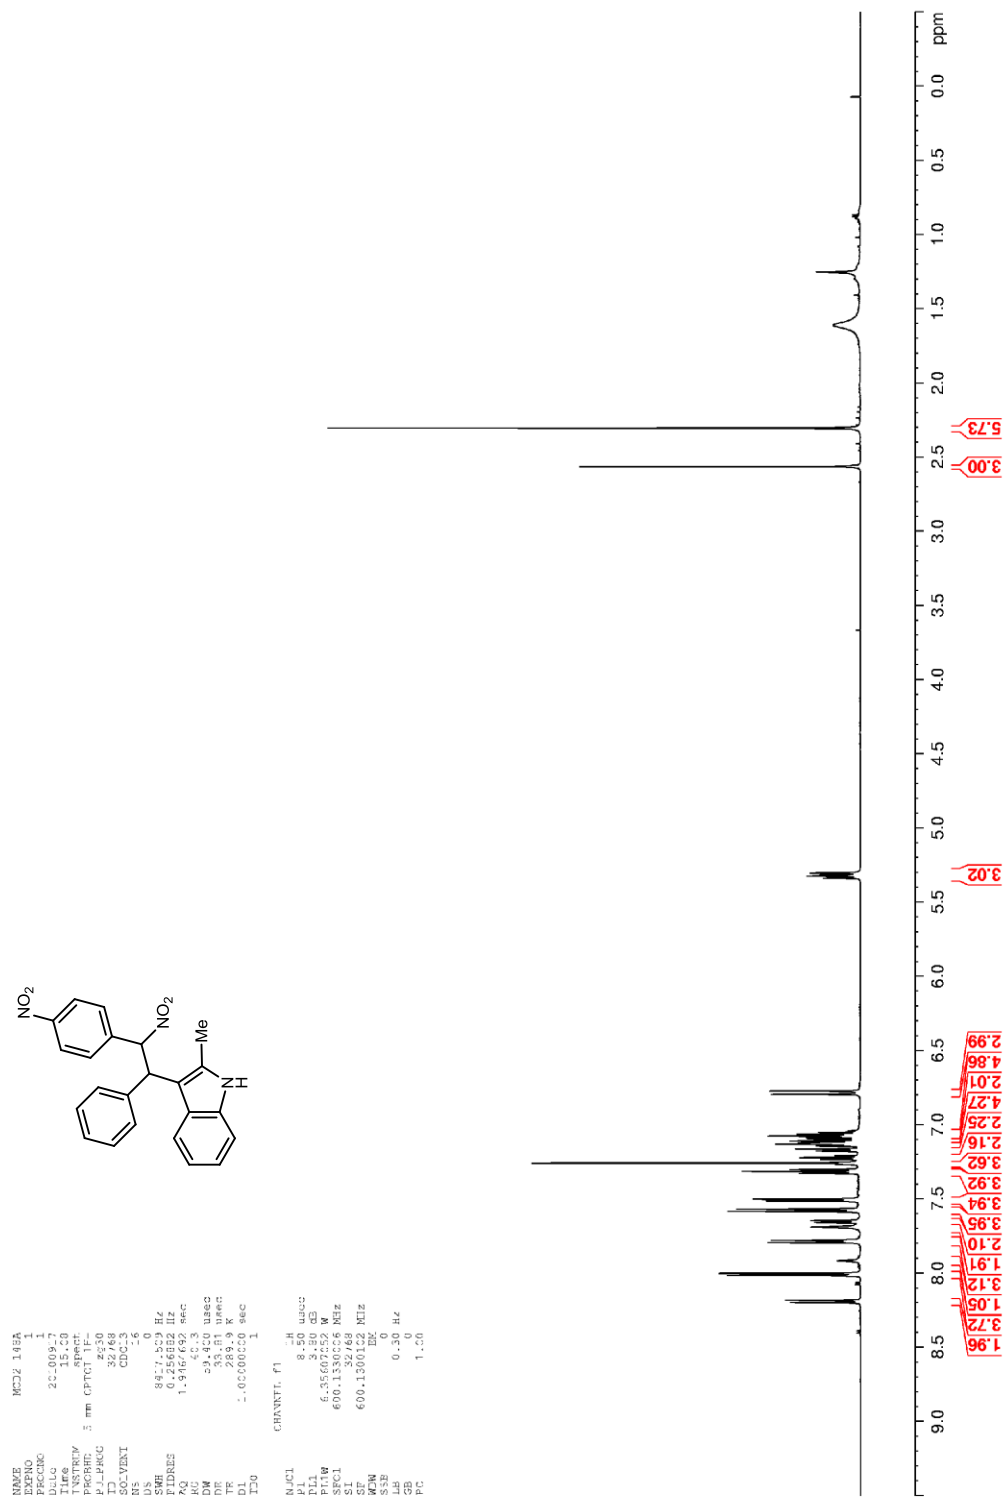

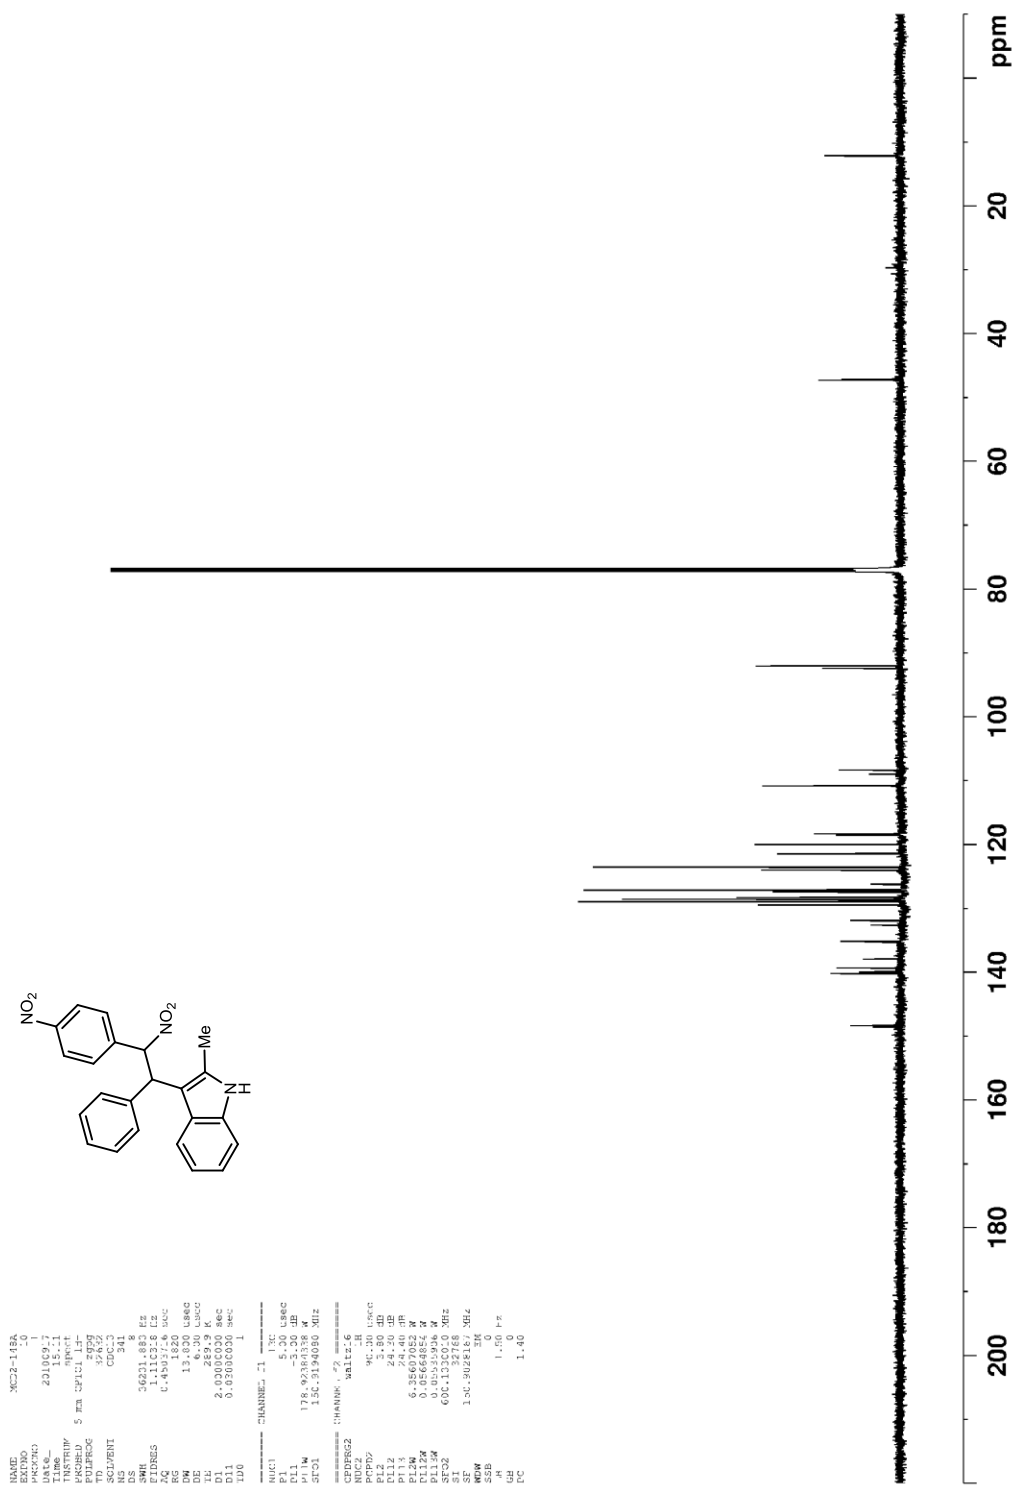



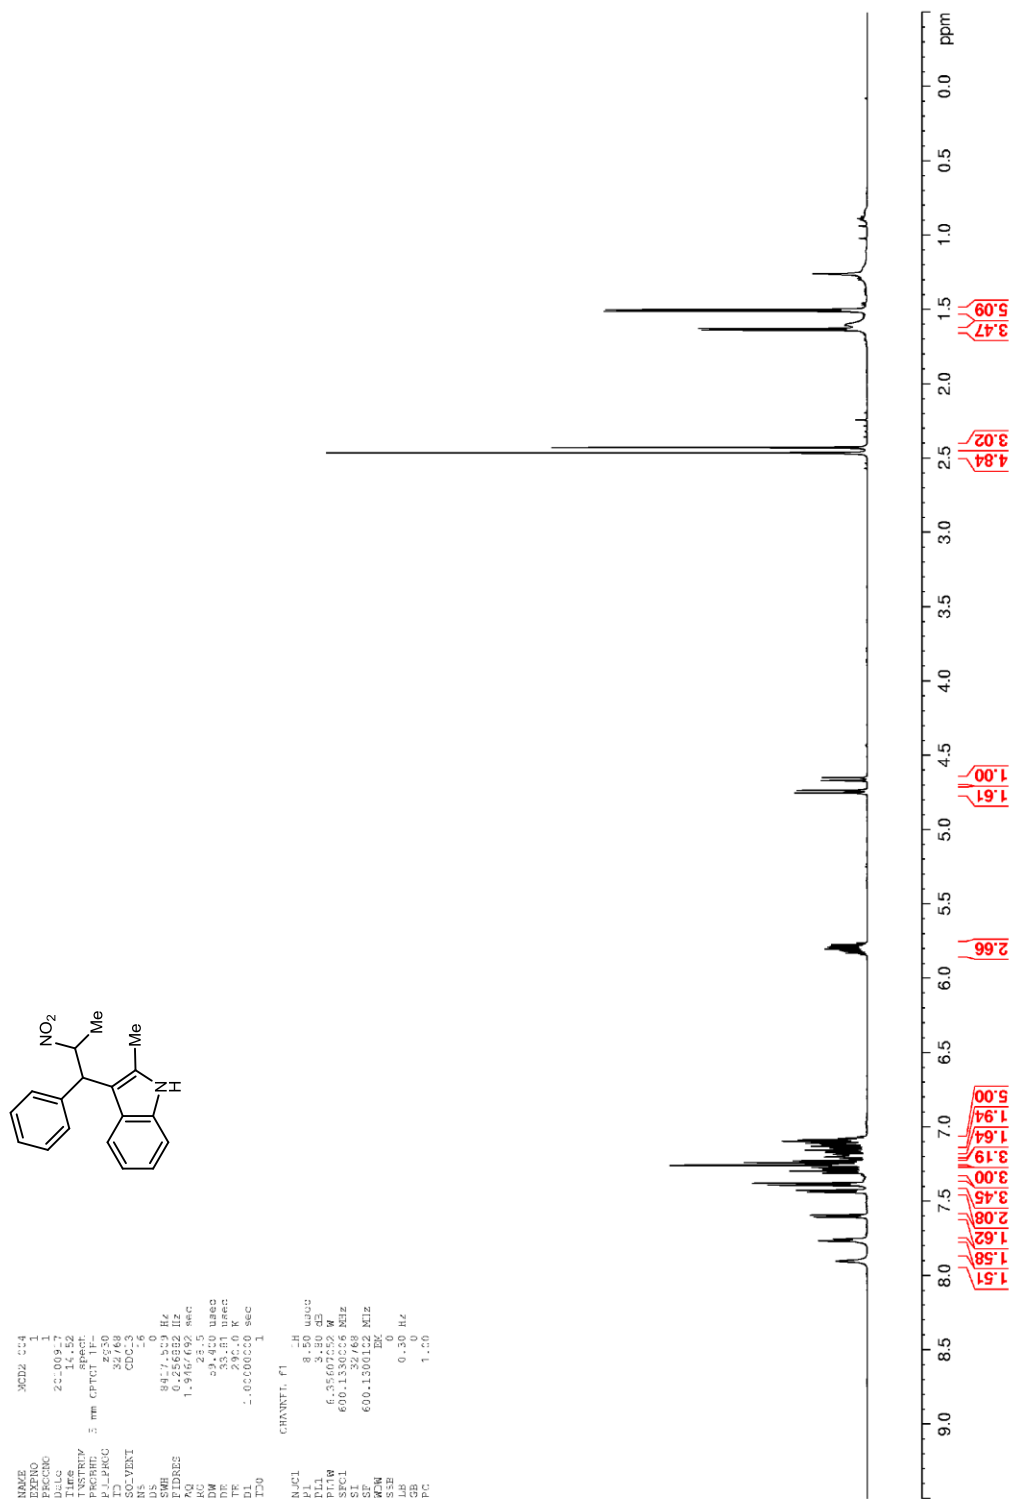



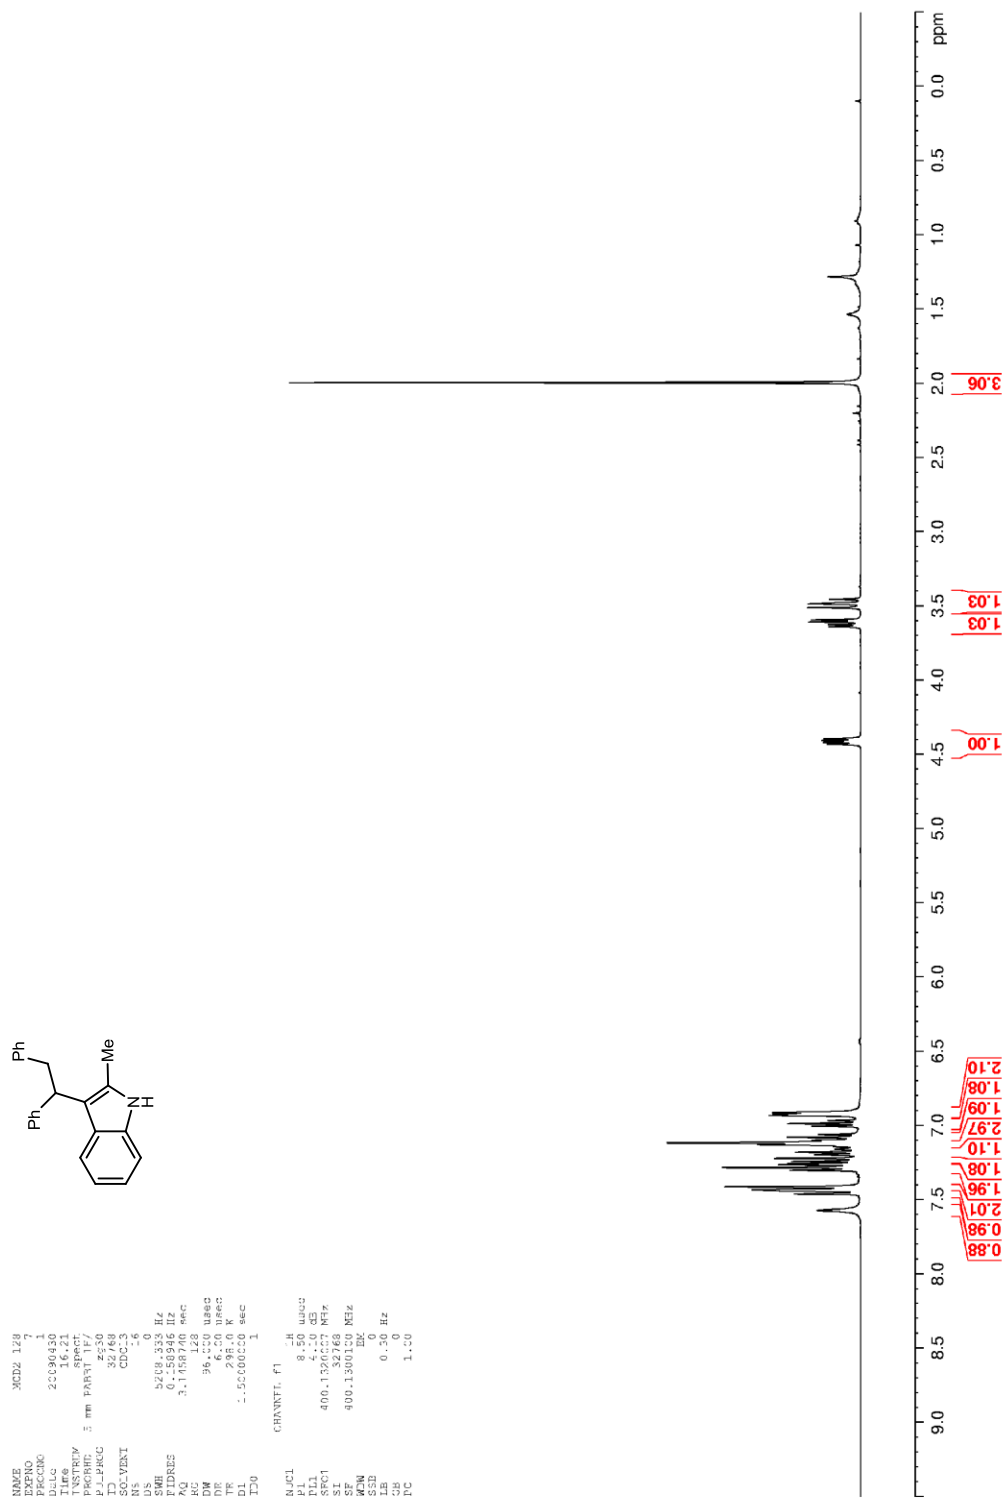

Supplement: NIHMS254090-supplement-2_si_002.pdf [file NIHMS254090-supplement-2_si_002.pdf]
